1 **OLIGOMERIZATION OF THE HUMAN ADENOSINE A<sub>2A</sub> RECEPTOR IS DRIVEN BY**  
2 **THE INTRINSICALLY DISORDERED C-TERMINUS**

3 **Author Line:** Khanh D. Q. Nguyen<sup>1</sup>, Michael Vigers<sup>2</sup>, Eric Sefah<sup>3</sup>, Susanna Seppälä<sup>2</sup>, Jennifer P.  
4 Hoover<sup>1</sup>, Nicole S. Schonenbach<sup>2</sup>, Blake Mertz<sup>3</sup>, Michelle A. O'Malley<sup>\*,2</sup>, Songi Han<sup>\*,1,2</sup>.

5 **Author Affiliations:**

6 <sup>1</sup>Department of Chemistry and Biochemistry, University of California – Santa Barbara, CA 93106  
7 <sup>2</sup>Department of Chemical Engineering, University of California – Santa Barbara, CA 93106  
8 <sup>3</sup>C. Eugene Bennett Department of Chemistry, West Virginia University, 217 Clark Hall,  
9 Morgantown, WV 26506

10 **Corresponding Authors:**

- 11 • **Songi Han** – Santa Barbara, CA 93106; (805) 893-4858; [songi@chem.ucsb.edu](mailto:songi@chem.ucsb.edu)  
12 • **Michelle A. O'Malley** – Santa Barbara, CA 93106; (805) 893-4769;  
13 [momalley@engineering.ucsb.edu](mailto:momalley@engineering.ucsb.edu)

14 **Classifications:** Biological Sciences – Biophysics and Computational Biology

15 **Keywords:** G protein-coupled receptors, oligomerization, intrinsically disordered protein, C-  
16 terminus, depletion interactions, size-exclusion chromatography, molecular dynamics simulations.

## 17 **SIGNIFICANCE**

18 G protein-coupled receptors (GPCRs) are important drug targets in medicine. While it is widely  
19 known that these receptors can form oligomers with unique functional consequences, the driving  
20 factor of receptor oligomerization remains unclear. The intrinsically disordered C-terminus of  
21 GPCRs is often thought to play no major role in receptor function and is thus usually removed to  
22 simplify biophysical studies. Using the human adenosine A<sub>2A</sub> receptor as a model GPCR, we find  
23 instead that its C-terminus drives oligomer formation via an intricate network of interactions. This  
24 finding suggests that the distinct properties associated with GPCR oligomerization may prevail  
25 only when the C-terminus is present.

## 26 **ABSTRACT**

27 G protein-coupled receptors (GPCRs) have long been shown to exist as oligomers with functional  
28 properties distinct from those of the monomeric counterparts, but the driving factors of GPCR  
29 oligomerization remain relatively unexplored. In this study, we focus on the human adenosine A<sub>2A</sub>  
30 receptor (A<sub>2A</sub>R), a model GPCR that forms oligomers both *in vitro* and *in vivo*. Combining  
31 experimental and computational approaches, we discover that the intrinsically disordered C-  
32 terminus of A<sub>2A</sub>R drives the homo-oligomerization of the receptor. The formation of A<sub>2A</sub>R  
33 oligomers declines progressively and systematically with the shortening of the C-terminus.  
34 Multiple interaction sites and types are responsible for A<sub>2A</sub>R oligomerization, including disulfide  
35 linkages, hydrogen bonds, electrostatic interactions, and hydrophobic interactions. These  
36 interactions are enhanced by depletion interactions along the C-terminus, forming a tunable  
37 network of bonds that allow A<sub>2A</sub>R oligomers to adopt multiple interfaces. This study uncovers the  
38 disordered C-terminus as a prominent driving factor for the oligomerization of a GPCR, offering  
39 important guidance for structure-function studies of A<sub>2A</sub>R and other GPCRs.

## 40 **INTRODUCTION**

41 G protein-coupled receptors (GPCRs) have long been studied as monomeric units, but  
42 accumulating evidence demonstrates that these receptors can also form homo- and hetero-  
43 oligomers with far-reaching functional implications. The properties emerging from these  
44 oligomers can be distinct from those of the monomeric protomers in ligand binding(1–4), G protein

45 coupling(5–9), downstream signaling(10–13), and receptor internalization/desensitization(14–16).  
46 With the vast number of genes identified in the human genome(17), GPCRs are able to form a  
47 daunting number of combinations with unprecedented functional consequences. The existence of  
48 this intricate network of interactions among GPCRs presents major challenges and opportunities  
49 for the development of novel therapeutic approaches(18–23). Hence, it is crucial to identify the  
50 driving factors that govern the oligomerization of GPCRs, such that the properties of GPCR  
51 oligomers can be understood.

52 GPCR oligomers with multiple interfaces(24–28) can give rise to myriad ways by which these  
53 complexes can be formed and their functions modulated. In the crystal structure of the turkey  $\beta_1$ -  
54 adrenergic receptor ( $\beta_1$ AR), the receptor appears to dimerize via two different interfaces, one  
55 formed via TM4/TM5 (transmembrane domains 4/5) and the other via TM1/TM2/H8 (helix 8)  
56 contacts(29). Similarly, in the crystal structure of the antagonist-bound  $\mu$ -opioid receptor ( $\mu$ -OR),  
57 the protomers also dimerize via two interfaces; however, only one of them is predicted to induce  
58 a steric hindrance that prevents activation of both protomers(30), hinting at interface-specific  
59 functional consequences. A recent computational study predicted that the adenosine  $A_{2A}$  receptor  
60 ( $A_{2A}$ AR) forms homodimers via three different interfaces and that the resulting dimeric architectures  
61 can modulate receptor function in different or even opposite ways(27). All of the above-mentioned  
62 interfaces are symmetric, meaning that the two protomers are in face-to-face orientations, hence  
63 forming strictly dimers. Asymmetric interfaces, reported in  $M_3$  muscarinic receptor(31),  
64 rhodopsin(32–34), and opsin(34), are in contrast formed with the protomers positioning face-to-  
65 back, possibly enabling the association of higher-order oligomers.

66 Not only do GPCRs adopt multiple oligomeric interfaces, but various studies also suggest that  
67 these interfaces may dynamically rearrange to activate receptor function(35). According to a recent  
68 computational study,  $A_{2A}$ AR oligomers can adopt eight different interfaces that interconvert when  
69 the receptor is activated or when there are changes in the local membrane environment(24).  
70 Similarly, a recent study that combined experimental and computational data proposed that  
71 neurotensin receptor 1 (NTS<sub>1</sub>R) dimer is formed by “rolling” interfaces that co-exist and  
72 interconvert when the receptor is activated(36). Clearly, meaningful functional studies of GPCRs  
73 require exploring their dynamic, heterogeneous oligomeric interfaces.

74 The variable nature of GPCR oligomeric interfaces suggests that protomers of GPCR oligomers  
75 may be connected by tunable interactions. In this study, we explore the role of an intrinsically  
76 disordered region (IDR) of a model GPCR that could engage in diverse non-covalent interactions,  
77 such as electrostatic interactions, hydrogen bonds, or hydrophobic interactions. These non-  
78 covalent interactions are readily tunable by external factors, such as pH, salts, and solutes, and  
79 further can be entropically stabilized by depletion interactions(37–39), leading to structure  
80 formation and assembly(40–47). In a system where large protein molecules and small solute  
81 particles typically coexist in solution, assembly of the protein molecules causes their excluded  
82 volumes to overlap and the solvent volume accessible to the solutes to increase, raising the entropy  
83 of the system. The type and concentration of solutes or ions can also remove water from the  
84 hydration shell around the proteins, further enhancing entropy-driven protein-protein association  
85 in what is known as the hydrophobic effect(48). This phenomenon is applied in the precipitation  
86 of proteins upon addition of so-called salting-out ions according to the Hofmeister series(49). The  
87 ability of IDRs to readily engage in these non-covalent interactions motivates our focus on the  
88 potential role of IDRs in driving GPCR oligomerization.

89 The cytosolic carboxy (C-)terminus of GPCRs is usually an IDR(50, 51). Varying in length among  
90 different GPCRs, the C-terminus is commonly removed in structural studies of GPCRs to enhance  
91 receptor stability and conformational homogeneity. A striking example is A<sub>2A</sub>R, a model GPCR  
92 with a particularly long, 122-residue, C-terminus that is truncated in all published structural  
93 biology studies(24, 27, 52–59). However, evidence is accumulating that such truncations—shown  
94 to affect GPCR downstream signaling(60–62)—may abolish receptor oligomerization(63, 64). A  
95 study using immunofluorescence has demonstrated that C-terminally truncated A<sub>2A</sub>R does not  
96 show protein aggregation or clustering on the cell surface, a process readily observed in the wild-  
97 type form(65). Our recent study employing a tandem three-step chromatography approach  
98 uncovered the impact of a single residue substitution of a C-terminal cysteine, C394S, in reducing  
99 the receptor homo-oligomerization *in vitro*(63). In the context of heteromerization, mass  
100 spectrometry and pull-down experiments have demonstrated that A<sub>2A</sub>R-D<sub>2</sub>R dimerization occurs  
101 via direct electrostatic interactions between the C-terminus of A<sub>2A</sub>R and the third intracellular loop  
102 of D<sub>2</sub>R(66). These results all suggest that the C-terminus may participate in A<sub>2A</sub>R oligomer

103 formation. However, no studies to date have directly and systematically investigated the role of  
104 the C-terminus, or any IDRs, in GPCR oligomerization.

105 This study focuses on the homooligomerization of the human adenosine A<sub>2A</sub>R, a model GPCR,  
106 and seeks to address: (i) whether the C-terminus engages in A<sub>2A</sub>R oligomerization, and if so, (ii)  
107 whether the C-terminus forms multiple oligomeric interfaces. We use size-exclusion  
108 chromatography (SEC) to assess the oligomerization levels of A<sub>2A</sub>R variants with strategic C-  
109 terminal modifications: mutations of a cysteine residue C394 and a cluster of charged residues  
110 <sup>355</sup>ERR<sup>357</sup>, as well as systematic truncations at eight different sites along its length. We  
111 complemented our experimental study with an independent molecular dynamics study of A<sub>2A</sub>R  
112 dimers of five C-terminally truncated A<sub>2A</sub>R variants designed to mirror the experimental constructs.  
113 We furthermore examined the oligomerization level of select C-terminally modified A<sub>2A</sub>R variants  
114 under conditions of ionic strength ranging from 0.15 to 0.95 M. To test whether the C-termini  
115 directly and independently promote A<sub>2A</sub>R oligomerization, we recombinantly expressed the entire  
116 A<sub>2A</sub>R C-terminal segment sans the transmembrane portion of the receptor and investigated its  
117 solubility and assembly properties with increasing ion concentration and temperature. This is the  
118 first study designed to uncover the role of the intrinsically disordered C-terminus on the  
119 oligomerization of a GPCR.

## 120 **RESULTS**

121 This study systematically investigates the role of the C-terminus on A<sub>2A</sub>R oligomerization and the  
122 nature of the interactions involved through strategic mutations and truncations at the C-terminus  
123 as well as modulation of the ionic strength of solvent. The experimental assessment of A<sub>2A</sub>R  
124 oligomerization relies on size-exclusion chromatography (SEC) analysis.

### 125 **Size Exclusion Chromatography Quantifies A<sub>2A</sub>R Oligomerization**

126 We performed SEC analysis on a mixture of ligand-active A<sub>2A</sub>R purified from a custom  
127 synthesized antagonist affinity column (**Fig. S1A**). Distinct oligomeric species were separated and  
128 eluted in the following order: high-molecular-weight (HMW) oligomer, dimer, and monomer (**Fig.**  
129 **1** and **Fig. S1B**). The population of each oligomeric species was quantified as the integral of each  
130 Gaussian from a multiple-Gaussian curve fit of the SEC signal. The reported standard errors were  
131 calculated from the variance of the fit that do not correspond to experimental errors (see **Table S1**  
132 and **Fig. S2** for SEC data corresponding to all A<sub>2A</sub>R variants in this study). As this study sought to  
133 identify the factors that promote A<sub>2A</sub>R oligomerization, the populations with oligomeric interfaces  
134 (*i.e.*, dimer and HMW oligomer) were compared with those without such interfaces (*i.e.*,  
135 monomer). Hence, the populations of the HMW oligomer and dimer were expressed relative to the  
136 monomer population in arbitrary units as monomer-equivalent concentration ratios, henceforth  
137 referred to as population levels (**Fig. 1**).

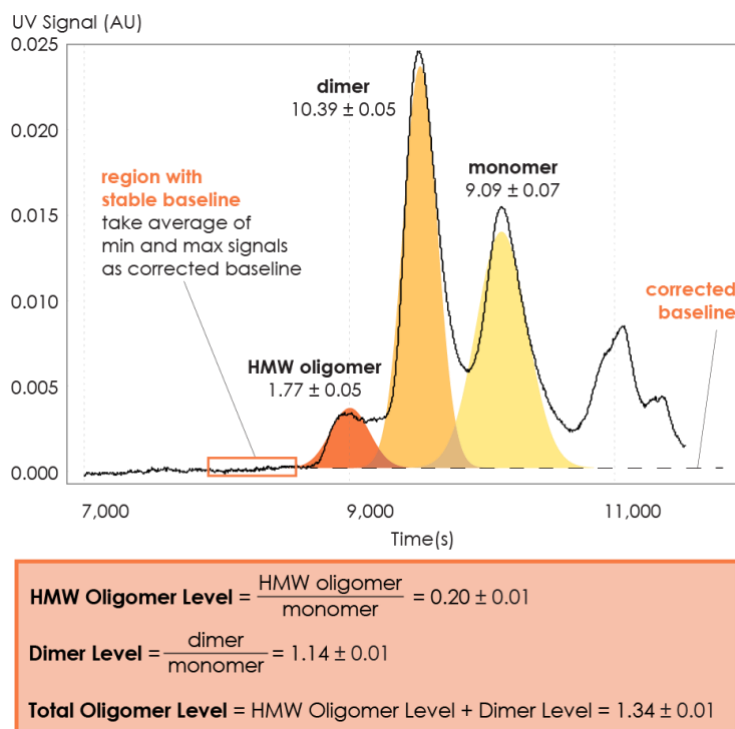

138 **Figure 1.** Method for collecting SEC data and assessing A<sub>2A</sub>R oligomerization. The SEC data is recorded every second  
139 as absorbance at 280 nm. The baseline is corrected to ensure uniform fitting and integration across the peaks. The  
140 areas under the curve, resulting from a multiple-Gaussian curve fit, express the population of each oligomeric species.  
141 The reported standard errors of integration are within a 95% confidence interval and are calculated from the variance  
142 of the fit, not experimental errors. The levels of HMW oligomer and dimer are expressed relative to the monomeric  
143 population in arbitrary units. A representative calculation defining the oligomer levels is given in the box.

## 144 C-Terminal Amino Acid Residue C394 Contributes to A<sub>2</sub>AR Oligomerization

145 To investigate whether the C-terminus of A<sub>2</sub>AR is involved in receptor oligomerization, we first  
146 examined the role of residue C394, as a previous study demonstrated that the mutation C394S  
147 dramatically reduced A<sub>2</sub>AR oligomer levels(63). The C394S mutation was replicated in our  
148 experiments, alongside other amino acid substitutions, namely alanine, leucine, methionine or  
149 valine, generating five A<sub>2</sub>AR-C394X variants. The HMW oligomer and dimer levels of A<sub>2</sub>AR wild-  
150 type (WT) were compared with those of the A<sub>2</sub>AR-C394X variants. We found that the dimer level  
151 of A<sub>2</sub>AR-WT was significantly higher than that of the A<sub>2</sub>AR-C394X variants (WT: 1.14; C394X:  
152 0.24–0.57; **Fig. 2A**). A similar result, though less pronounced, was observed when the HMW  
153 oligomer and dimer levels were considered together (WT: 1.34; C394X: 0.59–1.21; **Fig. 2A**). This  
154 suggests that residue C394 plays a role in A<sub>2</sub>AR oligomerization and more so in A<sub>2</sub>AR dimers.

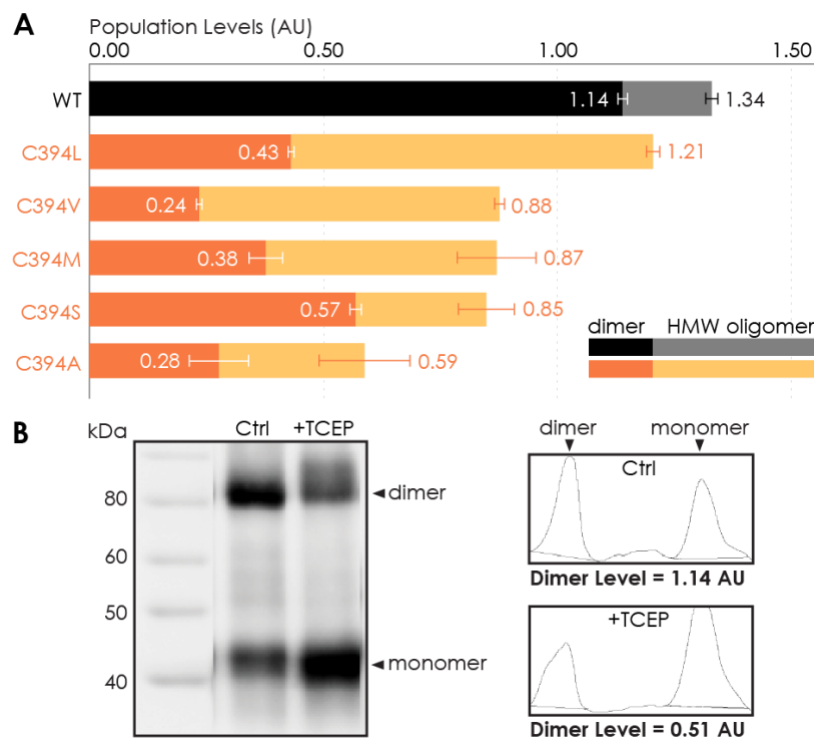

155

156 **Figure 2.** Residue C394 helps stabilize A<sub>2</sub>AR oligomerization via disulfide bonds. (A) The effect of C394X substitutions  
157 on A<sub>2</sub>AR oligomerization. The levels of dimer (dark colors) and HMW oligomer (light colors) are expressed relative  
158 to the monomeric population in arbitrary units, with reported errors calculated from the variance of the fit, not  
159 experimental variation. (B) Line densitometry of Western Blot bands on SEC-separated dimeric population with and



160 *without 5 mM TCEP. The level of dimer is expressed relative to the monomeric population in arbitrary units similarly*  
161 *to the SEC analysis. MagicMark protein ladder (LC5602) is used as the molecular weight standard.*

162 To test whether residue C394 stabilizes A<sub>2A</sub>R dimerization by forming disulfide linkages, we  
163 incubated SEC-separated A<sub>2A</sub>R dimer with 5 mM of the reducing agent TCEP, followed by SDS-  
164 PAGE and Western Blotting. The population of each species was determined as the area under the  
165 densitometric trace. The dimer level was then expressed as monomer-equivalent concentration  
166 ratios in a manner similar to that of the SEC experiment described above. Upon incubation with  
167 TCEP, the dimer level of the sample decreased from 1.14 to 0.51 (**Fig. 2B**). This indicates that  
168 disulfide bond formation via residue C394 is one possible mechanism for A<sub>2A</sub>R dimerization.  
169 However, a significant population of A<sub>2A</sub>R dimer remained resistant to TCEP and C394X  
170 mutations (**Fig. 2**), suggesting that disulfide linkages are not the only driving factor of A<sub>2A</sub>R  
171 oligomer formation. This finding agrees with a previous study showing that residue C394 in A<sub>2A</sub>R  
172 dimer is still available for nitroxide spin labeling,<sup>(63)</sup> suggesting that additional interfacial sites  
173 help drive A<sub>2A</sub>R dimer/oligomerization.

#### 174 **C-Terminus Truncation Systematically Reduces A<sub>2A</sub>R Oligomerization**

175 To determine which interfacial sites in the C-terminus other than C394 drive A<sub>2A</sub>R  
176 dimer/oligomerization, we carried out systematic truncations at eight sites along the C-terminus  
177 (A316, V334, G344, G349, P354, N359, Q372, and P395), generating eight A<sub>2A</sub>R-ΔC variants  
178 (**Fig. 3A**). The A<sub>2A</sub>R-A316ΔC variant corresponds to the removal of the entire disordered C-  
179 terminal region as previously performed in all published structural studies<sup>(24, 27, 52–59)</sup>. Using  
180 the SEC analysis described earlier (**Fig. 1**) we evaluated the HMW oligomer and dimer levels of  
181 the A<sub>2A</sub>R-ΔC variants relative to that of the A<sub>2A</sub>R full-length-wild-type (FL-WT) control. Both the  
182 dimer and the total oligomer levels of A<sub>2A</sub>R decreased progressively with the shortening of the C-  
183 terminus, with almost no oligomerization detected upon complete truncation of the C-terminus at  
184 site A316 (**Fig. 3B**). This result shows that the C-terminus drives A<sub>2A</sub>R oligomerization, with  
185 multiple potential interaction sites positioned along much of its length.

186 Interestingly, there occurred a dramatic decrease in the dimer level between the N359 and P354  
187 truncation sites, from a value of 0.81 to 0.19, respectively (**Fig. 3B**). A similar result, though less  
188 pronounced, was observed on the total oligomer level, with a decrease from 1.09 to 0.62 for the



189 N359 and P354 truncation sites, respectively (**Fig. 3B**). Clearly, the C-terminal segment  
 190 encompassing residues 354–359 (highlighted in black in **Fig. 3A**) is a key constituent of the A<sub>2A</sub>R  
 191 oligomeric interface.

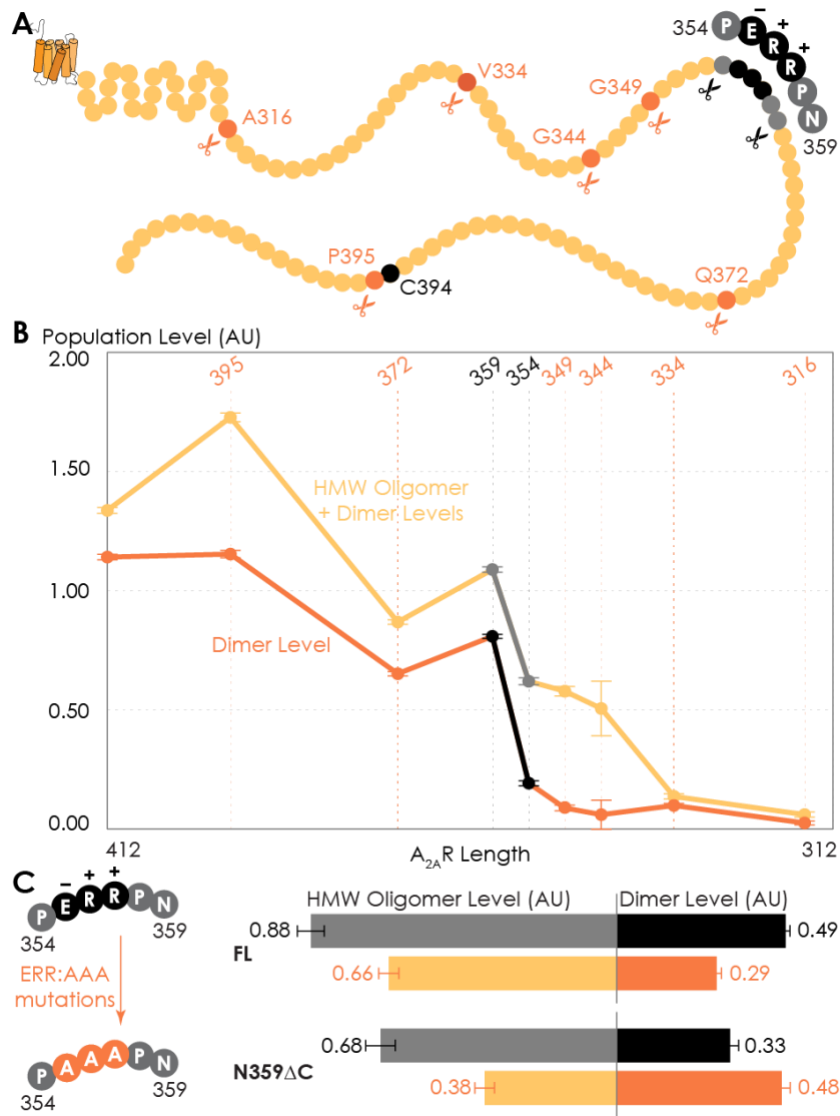

192

193 **Figure 3. Truncating the C-terminus systematically affects A<sub>2A</sub>R oligomerization.** (A) Depiction of where the  
 194 truncation points are located on the C-terminus, with region 354–359 highlighted (in black) showing critical residues.  
 195 (B) The levels of dimer and HMW oligomer are expressed relative to the monomeric population as an arbitrary unit  
 196 and plotted against the residue number of the truncation sites, with reported errors calculated from the variance of  
 197 the fit, not experimental variation. Region 354–359 is emphasized (in black and gray) due to a drastic change in the  
 198 dimer and HMW oligomer levels. (C) The dependence of A<sub>2A</sub>R oligomerization on three consecutive charged residues  
 199 <sup>355</sup>ERR<sup>357</sup>. The substitution of residues <sup>355</sup>ERR<sup>357</sup> to <sup>355</sup>AAA<sup>357</sup> is referred to as the ERR:AAA mutations. The levels of

200 *dimer and HMW oligomer are expressed relative to the monomeric population as an arbitrary unit, with reported*  
201 *errors calculated from the variance of the fit, not experimental variation.*

202 Since segment 354–359 contains three consecutive charged residues (<sup>355</sup>ERR<sup>357</sup>; **Fig. 3A**), which  
203 could be involved in electrostatic interactions, we hypothesized that this <sup>355</sup>ERR<sup>357</sup> cluster could  
204 strengthen inter-protomer A<sub>2A</sub>R-A<sub>2A</sub>R association. To test this hypothesis, residues <sup>355</sup>ERR<sup>357</sup> were  
205 substituted by <sup>355</sup>AAA<sup>357</sup> on A<sub>2A</sub>R-FL-WT and A<sub>2A</sub>R-N359ΔC to generate A<sub>2A</sub>R-ERR:AAA  
206 variants (**Fig. 3C**). We then compared the HMW oligomer and dimer levels of the resulting  
207 variants with controls (same A<sub>2A</sub>R variants but without the ERR:AAA mutations). We found that  
208 the ERR:AAA mutations had varied effects on the dimer level: decreasing for A<sub>2A</sub>R-FL-WT (ctrl:  
209 0.49; ERR:AAA: 0.29) but increasing for A<sub>2A</sub>R-N359ΔC (ctrl: 0.33; ERR:AAA: 0.48) (**Fig. 3C**).  
210 In contrast, the ERR:AAA mutations reduced the HMW oligomer level of both A<sub>2A</sub>R-FL-WT (ctrl:  
211 0.88; ERR:AAA: 0.66) and A<sub>2A</sub>R-N359ΔC (ctrl: 0.68; ERR:AAA: 0.38) (**Fig. 3C**). Consistently,  
212 the ERR:AAA mutation lowered the total oligomer level of both A<sub>2A</sub>R-FL-WT (ctrl: 1.37;  
213 ERR:AAA: 0.94) and A<sub>2A</sub>R-N359ΔC (ctrl: 1.01; ERR:AAA: 0.85) (**Fig. 3C**). These results  
214 suggest that the charged residues <sup>355</sup>ERR<sup>357</sup> participate in A<sub>2A</sub>R oligomerization, with a greater  
215 effect in the context of a longer C-terminus and for higher-order oligomer formation. The question  
216 then arises as to what types of interactions are formed along the C-terminus that help stabilize  
217 A<sub>2A</sub>R oligomerization.

### 218 **C-Terminus Truncation Disrupts Complex Network of Non-Bonded Interactions Necessary** 219 **for A<sub>2A</sub>R Dimerization.**

220 Given that the structure of A<sub>2A</sub>R dimers or oligomers are unknown, we next used molecular  
221 dynamics (MD) simulations to seek molecular-level insights into the role of the C-terminus in  
222 driving A<sub>2A</sub>R dimerization and to determine the specific interaction types and sites involved in this  
223 process. First, to explore A<sub>2A</sub>R dimeric interface, we performed coarse-grained (CG) MD  
224 simulations, which can access the length and time scales relevant to membrane protein  
225 oligomerization, albeit at the expense of atomic-level details. We carried out a series of CGMD  
226 simulations on five A<sub>2A</sub>R-ΔC variants designed to mirror the experiments by systematic truncation  
227 at five sites along the C-terminus (A316, V334, P354, N359, and C394). Our results revealed that  
228 A<sub>2A</sub>R dimers were formed with multiple interfaces, all involving the C-terminus (**Fig. 4A and S3A**).

229 The vast majority of A<sub>2A</sub>R dimers were symmetric, with the C-termini of the protomers directly  
230 interacting with each other. A smaller fraction of the dimers had asymmetric orientations, with the  
231 C-terminus of one protomer interacting with other parts of the other protomer, such as ICL2 (the  
232 second intracellular loop), ICL3, and ECL2 (the second extracellular loop) (**Fig. 4A**).

233 Our observation of multiple A<sub>2A</sub>R oligomeric interfaces, consistent with previous studies(24, 27),  
234 suggests that tunable, non-covalent intermolecular interactions are involved in receptor  
235 dimerization. We dissected two key non-covalent interaction types: electrostatic and hydrogen  
236 bonding interactions. (The criteria for designating inter-A<sub>2A</sub>R contacts as electrostatic interactions  
237 or hydrogen bonds are described in detail in **Materials and Methods**.) Electrostatic interactions  
238 were calculated from CGMD simulations. Hydrogen bonds were quantified from atomistic MD  
239 simulation, given that the CG model merges all hydrogens into a coarse-grained bead and hence  
240 cannot report on hydrogen bonds. This analysis was performed on the symmetric dimers as they  
241 constituted the majority of the assemblies. With the least truncated A<sub>2A</sub>R variant containing the  
242 longest C-terminus, A<sub>2A</sub>R-C394ΔC, we observed an average of 15.9 electrostatic contacts (**Fig.**  
243 **4B**) and 26.7 hydrogen bonds (**Fig. 4C**) between the C-termini of the protomers. This result shows  
244 that both electrostatic interactions and hydrogen bonds play important roles in A<sub>2A</sub>R dimer  
245 formation.

246 Upon further C-terminus truncation, the average number of both electrostatic contacts and  
247 hydrogen bonds involving C-terminal residues progressively declined, respectively reaching 5.4  
248 and 6.0 for A<sub>2A</sub>R-A316ΔC (in which the disordered region of the C-terminus is removed) (**Fig. 4B**  
249 and **4C**). This result is consistent with the experimental result, which demonstrated a progressive  
250 decrease of A<sub>2A</sub>R oligomerization with the shortening of the C-terminus (**Fig. 3B**). Interestingly,  
251 upon systematic truncation of the C-terminal segment 335–394, we observed in segment 291–334  
252 a steady decrease in the average number of electrostatic contacts, from 10.4 to 7.4 (**Fig. 4B**). This  
253 trend was even more pronounced with hydrogen bonding contacts involving segment 291–334  
254 decreasing drastically from 21.0 to 7.0 as segment 335–394 was gradually removed (**Fig. 4C**).  
255 This observation, namely that truncation of a C-terminal segment reduces inter-A<sub>2A</sub>R contacts  
256 elsewhere along the C-terminus, indicates that a cooperative mechanism of dimerization exists, in  
257 which an extended C-terminus of A<sub>2A</sub>R stabilizes inter-A<sub>2A</sub>R interactions near the heptahelical  
258 bundles of the dimeric complex. Besides the intermolecular interactions, we also identified a

259 network of intramolecular salt bridges involving residues on the C-termini, including cluster  
260 <sup>355</sup>ERR<sup>357</sup> (Fig. 7A). These results demonstrate that A<sub>2A</sub>R dimers can be formed via multiple  
261 interfaces predominantly in symmetric orientations, facilitated a cooperative network of  
262 electrostatic interactions and hydrogen bonds along much of its C-terminus.

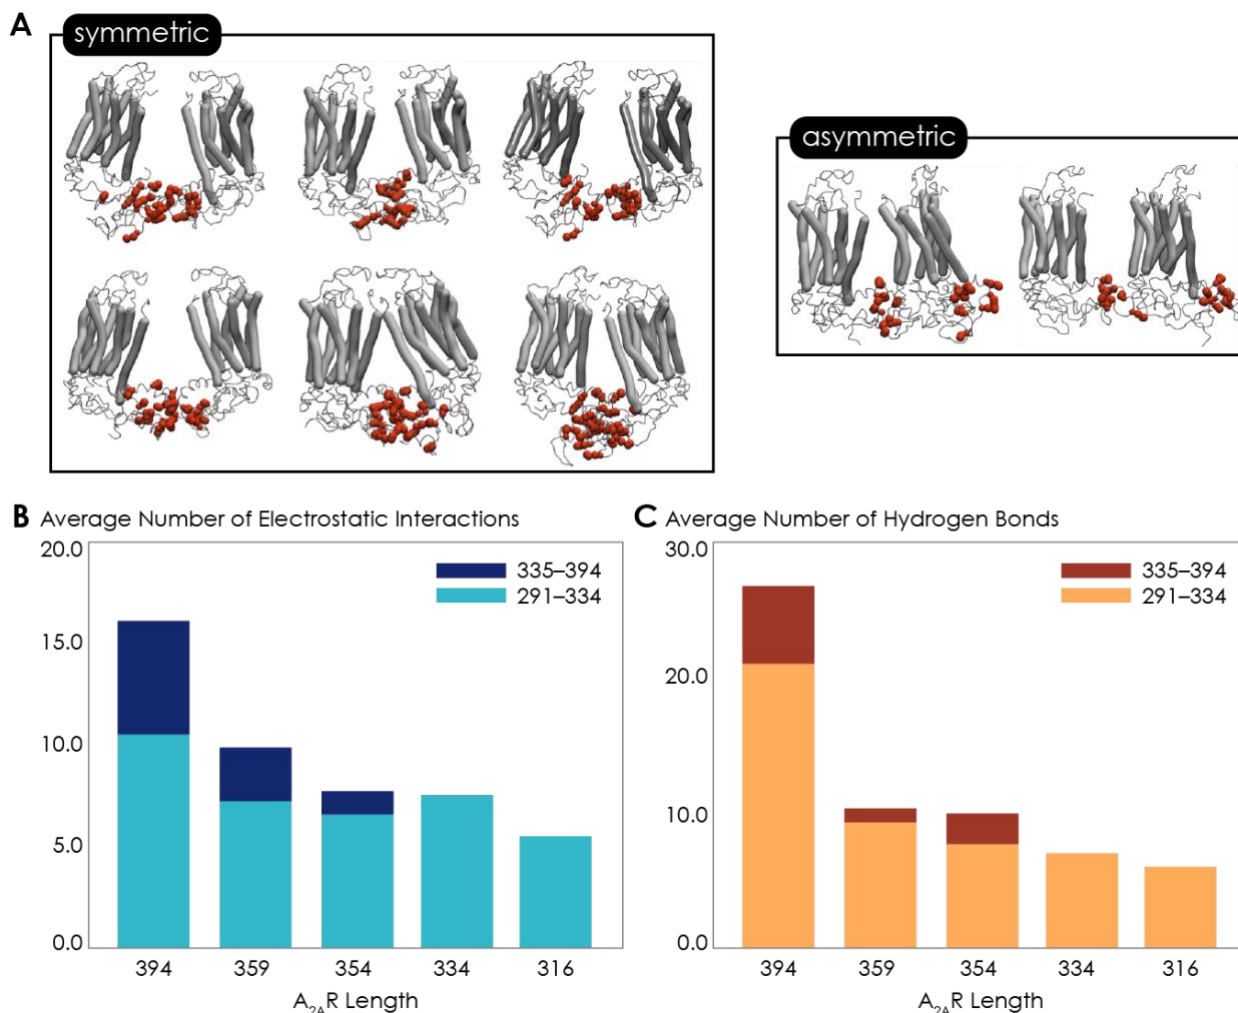

263 **Figure 4.** Non-bonded interactions of the extended C-terminus of A<sub>2A</sub>R play a critical role in stabilization of the  
264 dimeric interface. (A) Dimer configurations from cluster analysis in GROMACS of the 394-residue variant identify  
265 two major clusters involving either 1) the C-terminus of one protomer and the C-terminus, ICL2, and ICL3 of the  
266 second protomer or 2) the C-terminus of one protomer and ICL2, ICL3, and ECL2 of the second protomer. Spheres:  
267 residues forming intermolecular electrostatic contacts. (B) Average number of residues that form electrostatic  
268 contacts as a function of sequence length of A<sub>2A</sub>R. (C) Average number of residues that form hydrogen bonds as a  
269 function of sequence length of A<sub>2A</sub>R.

## 270 Ionic Strength Modulates Oligomerization of C-Terminally Truncated A<sub>2A</sub>R Variants

271 So far, we have demonstrated that the C-terminus clearly plays a role in forming A<sub>2A</sub>R oligomeric  
272 interfaces. However, the driving factors of A<sub>2A</sub>R oligomerization remain unknown. The variable  
273 nature of A<sub>2A</sub>R oligomeric interfaces suggests that the main driving forces must be non-covalent  
274 interactions, such as electrostatic interactions and hydrogen bonds as identified by the above MD  
275 simulations. Modulating the solvent ionic strength is an effective method to identify the types of  
276 non-covalent interaction(s) at play. Specifically, with increasing ionic strength, electrostatic  
277 interactions can be weakened (based on Debye-Hückel theory, most electrostatic bonds at a  
278 distance greater than 5 Å are screened out at an ionic strength of 0.34 M at 4°C), depletion  
279 interactions are enhanced with salting-out salts, and hydrogen bonds remain relatively impervious.  
280 For this reason, we subjected various A<sub>2A</sub>R variants (FL-WT, FL-ERR:AAA, N359ΔC, and  
281 V334ΔC) to ionic strength ranging from 0.15 to 0.95 M by adding NaCl (buffer composition  
282 shown in **Table 1**). The HMW oligomer and dimer levels of the four A<sub>2A</sub>R variants were  
283 determined and plotted as a function of ionic strengths.

284 The low ionic strength of 0.15 M should not affect hydrogen bonds or electrostatic interactions, if  
285 present. We found that the dimer and total oligomer levels of all four variants were near zero (**Fig.**  
286 **5**). This is a striking observation, as it already excludes electrostatic and hydrogen-bonding  
287 interactions as the dominant force for A<sub>2A</sub>R association. The question remains whether depletion  
288 interactions could be involved.

289 At higher ionic strengths of 0.45 M and 0.95 M, the dimer and total oligomer levels of A<sub>2A</sub>R-  
290 V334ΔC still remained near zero (**Fig. 5**). In contrast, we observed a progressive and significant  
291 increase in the dimer and total oligomer levels of A<sub>2A</sub>R-FL-WT with increasing ionic strength (**Fig.**  
292 **5**). This result indicates A<sub>2A</sub>R oligomerization must be driven by depletion interactions, which are  
293 enhanced with increasing ionic strength, and that these interactions involve the C-terminal segment  
294 after residue V334.

295 Upon closer examination, we recognize that at the very high ionic strength of 0.95 M, the increase  
296 in the dimer and total oligomer levels was robust for A<sub>2A</sub>R-FL-WT, but less pronounced for A<sub>2A</sub>R-  
297 FL-ERR:AAA (**Fig. 5**). Furthermore, this high ionic strength even had an opposite effect on A<sub>2A</sub>R-  
298 N359ΔC, with both its dimer and total oligomer levels abolished (**Fig. 5**). These results indicate

299 that the charged cluster <sup>355</sup>ERR<sup>357</sup> and the C-terminal segment after residue N359 are required for  
300 depletion interactions to promote A<sub>2</sub>AR oligomerization to the full extent.

301 Taken together, we demonstrated that A<sub>2</sub>AR oligomerization is more robust when the C-terminus  
302 is fully present and the ionic strength is higher, suggesting that depletion interactions via the C-  
303 terminus are a strong driving factor of A<sub>2</sub>AR oligomerization. The question then arises whether  
304 such depletion interactions are the result of the C-termini directly interacting with one another,  
305 necessitating an experiment that investigates the behavior of A<sub>2</sub>AR C-terminus sans the  
306 transmembrane domains.

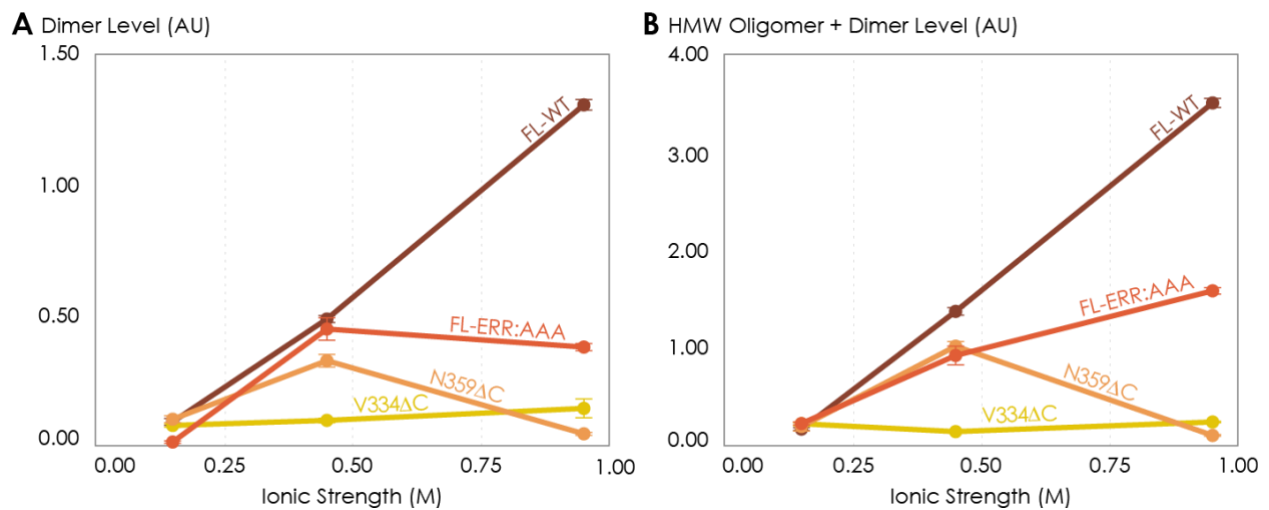

307

308 **Figure 5.** The effects of ionic strength on the oligomerization of various A<sub>2</sub>AR variants reveal the involvement of  
309 depletion interactions. The levels of dimer and HMW oligomer are expressed relative to the monomeric population as  
310 an arbitrary unit and plotted against ionic strength, with reported errors calculated from the variance of the fit, not  
311 experimental variation. NaCl concentration is varied to achieve ionic strengths of 0.15, 0.45, and 0.95 M.

### 312 The Isolated A<sub>2</sub>AR C-Terminus Is Prone to Aggregation

313 To test whether A<sub>2</sub>AR oligomerization is driven by direct depletion interactions among the C-  
314 termini of the protomers, we assayed the solubility and assembly properties of the stand-alone  
315 A<sub>2</sub>AR C-terminus—an intrinsically disordered peptide—sans the upstream transmembrane regions.  
316 Since depletion interactions can be manifested via the hydrophobic effect(48), we examined  
317 whether this effect can cause A<sub>2</sub>AR C-terminal peptides to associate.



318 It is an active debate(67) whether the hydrophobic effect can be promoted or suppressed by ions  
319 with salting-out or salting-in tendency, respectively(68–70). We increased the solvent ionic  
320 strength using either sodium (salting-out) or guanidinium (salting-in) ions and assessed the  
321 aggregation propensity of the C-terminal peptides using UV-Vis absorption at 450 nm. We first  
322 observed the behavior of the C-terminus with increasing salting-out NaCl concentrations. At NaCl  
323 concentrations below 1 M, the peptide was dominantly monomeric, despite showing slight  
324 aggregation at NaCl concentrations between 250–500 mM (**Fig. 6A**). At NaCl concentrations  
325 above 1 M, A<sub>2A</sub>R C-terminal peptides strongly associated into insoluble aggregates (**Fig. 6A**).  
326 Consistent with the observations made with the intact receptor (**Fig. 5**), A<sub>2A</sub>R C-terminus showed  
327 the tendency to progressively precipitate with increasing ionic strengths, suggesting that depletion  
328 interactions drive the association and precipitation of the peptides. We next observed the behavior  
329 of the C-terminus with increasing concentrations of guanidine hydrochloride (GdnHCl), which  
330 contains salting-in cations that do not cause proteins to precipitate and instead facilitate the  
331 solubilization of proteins(71, 72). Our results demonstrated that the A<sub>2A</sub>R C-terminus incubated in  
332 4 M GdnHCl showed no aggregation propensity (**Fig. 6A**), validating our expectation that  
333 depletion interactions are not enhanced by salting-out salts. These observations demonstrate that  
334 the C-terminal peptide in and of itself can directly interact with other C-terminal peptides to form  
335 self-aggregates in the presence of ions, and presumably solutes, that have salting-out effects.

336 Attractive hydrophobic interactions among the hydrophobic residues are further enhanced by water  
337 solvating the protein having more favorable interactions with other water molecules, ions or  
338 solutes than with the protein, here the truncated C-terminus(73–75). We explored the possible  
339 contribution of hydrophobic interactions to the aggregation of the C-terminal peptides using  
340 differential scanning fluorimetry (DSF). In particular, we gradually increased the temperature to  
341 melt the C-terminal peptides, exposing any previously buried hydrophobic residues (**Fig. S4A**)  
342 which then bound to the SYPRO orange fluorophore, resulting in an increase in fluorescence signal.  
343 Our results showed that as the temperature increased, a steady rise in fluorescence was observed  
344 (**Fig. 6B**), indicating that multiple hydrophobic residues were gradually exposed to the SYPRO  
345 dye. However, at approximately 65°C, the melt peak signal was abruptly quenched (**Fig. 6B**),  
346 indicating that the hydrophobic residues were no longer exposed to the dye. This observation  
347 suggests that, at 65°C, enough hydrophobic residues in the C-terminal peptides were exposed such



348 that they collapsed on one another (thus expelling the bound dye molecules), resulting in  
349 aggregation. Clearly, the hydrophobic effect can cause A<sub>2A</sub>R C-terminal peptides to directly  
350 associate. These results demonstrate that A<sub>2A</sub>R oligomer formation can be driven by depletion  
351 interactions among the C-termini of the protomers.

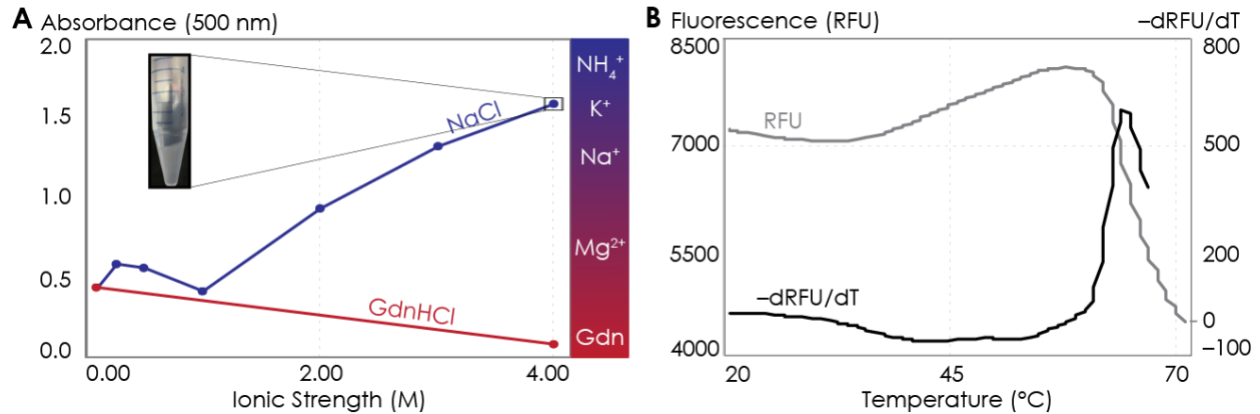

352

353 **Figure 6.** The A<sub>2A</sub>R C-terminus is prone to aggregation. (A) Absorbance at 500 nm of the A<sub>2A</sub>R C-terminus in solution,  
354 with NaCl and GdnHCl concentrations varied to achieve ionic strengths 0–4 M. Inset: the solution at ionic strength  
355 4 M achieved with NaCl. The Hofmeister series is provided to show the ability of cations to salt out (blue) or salt in  
356 (red) proteins. (B) SYPRO orange fluorescence of solutions containing the A<sub>2A</sub>R C-terminus as the temperature was  
357 varied from 20 to 70°C (grey). The change in fluorescence, measured in relative fluorescence unit (RFU), was  
358 calculated by taking the first derivative of the fluorescence curve (black).

## 359 DISCUSSION

360 The key finding of this study is that the C-terminus of A<sub>2A</sub>R, removed in all previously published  
361 structural studies of this receptor, is directly responsible for receptor oligomerization. Using a  
362 combination of experimental and computational approaches, we demonstrate that the C-terminus  
363 drives A<sub>2A</sub>R oligomerization via a combination of disulfide linkages, hydrogen bonds, electrostatic  
364 interactions, and hydrophobic interactions. This diverse combination of interactions is greatly  
365 enhanced by depletion interactions, forming a network of malleable bonds that give rise to the  
366 existence of multiple A<sub>2A</sub>R oligomeric interfaces.

367 The intermolecular disulfide linkages associated with residue C394 play a role in A<sub>2A</sub>R  
368 oligomerization. However, it is unclear which cysteine on the second protomer is linked to this  
369 cysteine. A previous study showed that residue C394 in A<sub>2A</sub>R dimer is available for nitroxide spin

370 labeling(63), suggesting that some of these disulfide bonds may be between residue C394 and  
371 another cysteine in the hydrophobic core of A<sub>2A</sub>R that do not form intramolecular disulfide  
372 bonds(76–78). Many examples exist where disulfide linkages help drive GPCR oligomerization,  
373 including the CaR-mGluR<sub>1</sub> heterodimer(79), homodimers of mGluR<sub>5</sub>(80), M<sub>3</sub>R(81), V<sub>2</sub>R(82), 5-  
374 HT<sub>4</sub>R(83) and 5-HT<sub>1D</sub>R(84), and even higher-order oligomers of D<sub>2</sub>R(85). However, although  
375 unconventional cytoplasmic disulfide bonds have been reported(86, 87), no study has shown how  
376 such linkages would be formed *in vivo*, as the cytoplasm lacks the conditions and machinery  
377 required for disulfide bond formation(88–91). Nevertheless, residue C394 is highly conserved and  
378 a C-terminal cysteine is almost always present among A<sub>2A</sub>R homologs(92), suggesting that this  
379 cysteine cannot be excluded for serving an important role *in vivo*.

380 The electrostatic interactions that stabilize A<sub>2A</sub>R oligomer formation come from multiple sites  
381 along the C-terminus. From a representative snapshot of a A<sub>2A</sub>R-C394ΔC dimer from our MD  
382 simulations (**Fig. 7A**), we could visualize not only the intermolecular interactions calculated from  
383 the CGMD simulations (**Fig. 4B**), but also intramolecular salt bridges. In particular, the <sup>355</sup>ERR<sup>357</sup>  
384 cluster of charged residues lies distal from the dimeric interface, yet still forms several salt bridges  
385 (**Fig. 7A**, inset). This observation is supported by our experimental results showing that  
386 substituting this charged cluster with alanines reduces the total A<sub>2A</sub>R oligomer levels (**Fig. 3C**).  
387 However, it is unclear how such salt bridges involving this <sup>355</sup>ERR<sup>357</sup> cluster are enhanced by  
388 depletion interactions (**Fig. 5**), as electrostatic interactions are usually screened out at high ionic  
389 strengths. In our MD simulations, we also observed networks of salt bridges along the dimeric  
390 interface, for example between K315 of one monomer and D382 and E384 of the other monomer  
391 (**Fig. 7A**, inset). The innate flexibility of the C-terminus could facilitate the formation of such salt  
392 bridges, which then acts as a potential scaffold to stabilize A<sub>2A</sub>R dimers.

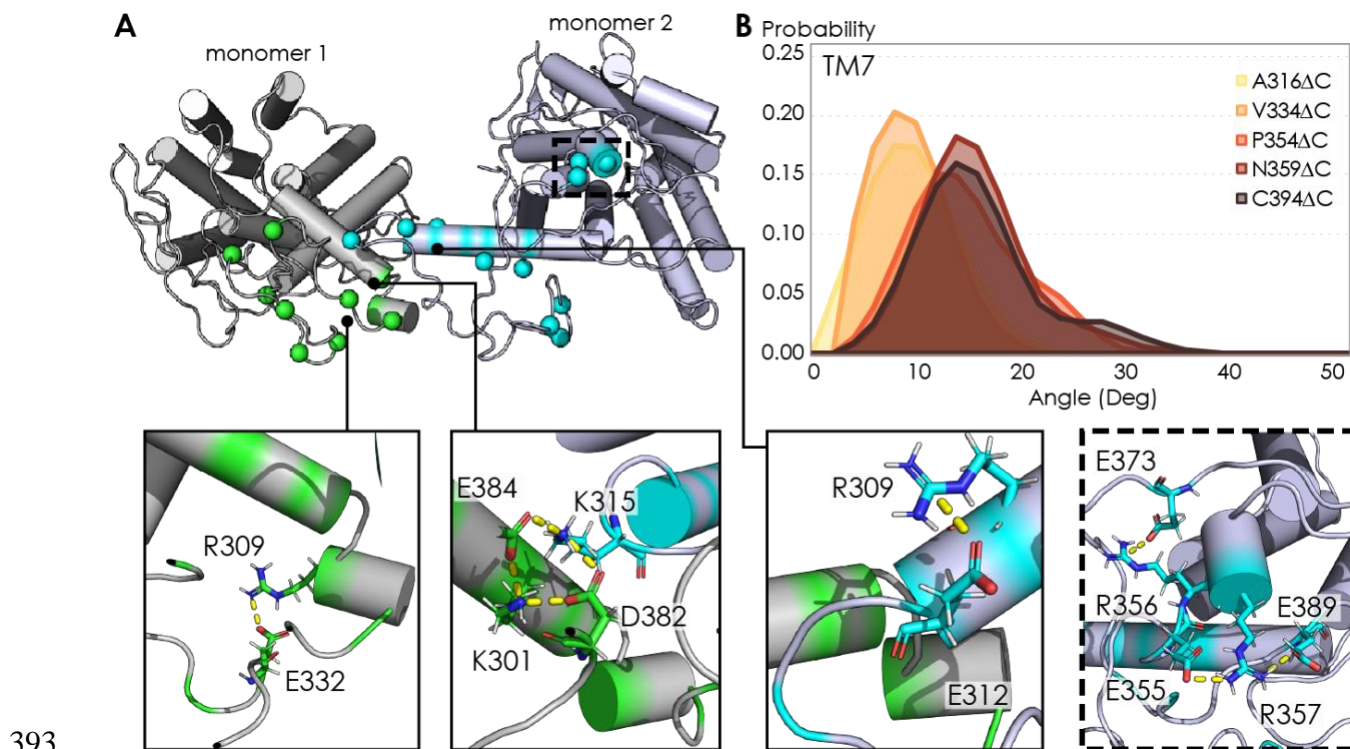

393  
 394 **Figure 7.** (A) Representative snapshot of  $A_{2A}R$ -C394AC dimers shows salt bridge formation between a sample  
 395 trajectory. The insets are close-ups of the salt bridges, which can be both intra- and intermolecular. The last inset  
 396 shows a network of salt bridges with the charged cluster  $^{355}ERR^{357}$  involved. (B) Helical tilt angles for TM7 helix in  
 397  $A_{2A}R$  as a function of protein length. Systematic truncations of the C-terminus lead to rearrangement of the  
 398 heptahelical bundle. The participation of the C-terminus in  $A_{2A}R$  dimerization increases the tilting of the TM7 domain,  
 399 which is in closest proximity to the C-terminus.

400 We also found that depletion interactions can enhance the diversity of interactions that stabilize  
 401  $A_{2A}R$  oligomer formation (Fig. 5 and 6). Depletion interactions could be the key factor to the  
 402 cooperative mechanism by which  $A_{2A}R$  oligomerization occurs. As revealed by our MD  
 403 simulations, an increasing number of contacts are formed along segment 291–334 when the rest  
 404 of C-terminus is present (Fig. 4B and 4C). As more of the C-terminus is preserved, the greater  
 405 extent of depletion interactions limits the available dimer arrangements, forcing segment 291–334  
 406 into an orientation that optimizes intermolecular interactions.

407 Our finding that  $A_{2A}R$  forms homo-oligomers via multiple interfaces (Fig. 4A) agrees with the  
 408 increasing number of studies reporting multiple and interconverting oligomeric interfaces in  $A_{2A}R$   
 409 and other GPCRs(24–36). When translated to *in vivo* situations, GPCR oligomers can also

410 transiently associate and dissociate(93–96). Such fast conformational changes require that the  
411 oligomeric interfaces be formed by interactions that can easily be modulated. This is consistent  
412 with our study, which demonstrates that depletion interactions via the intrinsically disordered,  
413 malleable C-terminus drive A<sub>2A</sub>R oligomerization. Because depletion interactions can be readily  
414 tuned by environmental factors, such as ionic strength, molecular crowding, and temperature, the  
415 formation of GPCR oligomeric complexes could be dynamically modulated in response to  
416 environmental cues to regulate receptor function.

417 Not only did we find multiple A<sub>2A</sub>R oligomeric interfaces, we also found that these interfaces can  
418 be either symmetric or asymmetric. This finding is supported by a growing body of evidence that  
419 there exists both symmetric and asymmetric oligomeric interfaces for A<sub>2A</sub>R(24) and many other  
420 GPCRs. Studies using various biochemical and biophysical techniques have shown that  
421 heterotetrameric GPCR complexes can be formed by dimers of dimers, including  $\mu$ OR- $\delta$ OR(97),  
422 CXC<sub>4</sub>R-CC<sub>2</sub>R(98), CB<sub>1</sub>R/D<sub>2</sub>R(99) as well as those involving A<sub>2A</sub>R, such as A<sub>1</sub>R-A<sub>2A</sub>R(61, 100)  
423 and A<sub>2A</sub>R-D<sub>2</sub>R(101). The quaternary structures identified in these studies required specific  
424 orientations of each protomer, with the most viable model involving a stagger of homodimers with  
425 symmetric interfaces(102). On the other hand, since symmetric interfaces limit the degree of  
426 receptor association to dimers, the HMW oligomer of A<sub>2A</sub>R observed in this(24) and other  
427 studies(63, 103) can only be formed via asymmetric interfaces. It is indeed tempting to suggest  
428 that the formation of the HMW oligomer of A<sub>2A</sub>R may even arise from combinations of different  
429 interfaces. In any case, the wide variation of GPCR oligomerization requires the existence of both  
430 symmetric and asymmetric oligomeric interfaces.

431 In the case of A<sub>2A</sub>R, displacement of the transmembrane domains have been demonstrated to be  
432 the hallmark of receptor activation(104–107). However, no studies have linked receptor  
433 oligomerization with the arrangement of the TM bundles in A<sub>2A</sub>R. Our MD simulations revealed  
434 that C-terminus truncation resulted in structural changes in the heptahelical bundles of A<sub>2A</sub>R  
435 dimers. Specifically, as more of the C-terminus was preserved, we observed a progressive increase  
436 in the helical tilt of TM7 (**Fig. 7B**). This change in helical tilt occurred for the entire heptahelical  
437 bundle, with an increase in tilt for TM1, TM2, TM3, TM5, and TM7, and a decrease in tilt for  
438 TM4 and TM6 (**Fig. S3**). The longer C-terminus in the full-length A<sub>2A</sub>R permits greater  
439 rearrangements in the transmembrane regions, leading to the observed change in helical tilt. This

440 result hints at potential conformational changes of A<sub>2A</sub>R upon oligomerization, necessitating future  
441 investigation on functional consequences.

442 C-terminal truncations prior to crystallization and structural studies may be the main reason for  
443 the scarcity of GPCR structures featuring oligomers. In that context, this study offers valuable  
444 insights and approaches to tune the oligomerization of A<sub>2A</sub>R and potentially of other GPCRs using  
445 its intrinsically disordered C-terminus. The presence of A<sub>2A</sub>R oligomeric populations with partial  
446 C-terminal truncations means that one can now study its oligomerization with less perturbation  
447 from the C-terminus. We also present evidence that the multiple C-terminal interactions that drive  
448 A<sub>2A</sub>R oligomerization can be easily modulated by ionic strength and specific salts (**Fig. 5** and **6**).  
449 Given that ~75% and ~15% of all class-A GPCRs possess a C-terminus of > 50 and > 100 amino  
450 acid residues(108), respectively, it will be worthwhile to explore the prospect of tuning GPCR  
451 oligomerization not only by shortening the C-terminus but also with simpler approaches such as  
452 modulating ionic strength and the surrounding salt environment.

## 453 **CONCLUSION**

454 This study emphasizes for the first time the definite impact of the C-terminus on A<sub>2A</sub>R  
455 oligomerization, which can be extended to include the oligomers formed by other GPCRs with a  
456 protracted C-terminus. We have shown that the oligomerization of A<sub>2A</sub>R is strongly driven by  
457 depletion interactions along the C-terminus, further modulating and enhancing the multiple  
458 interfaces formed via a combination of hydrogen, electrostatic, hydrophobic, and covalent  
459 disulfide interactions. The task remains to link A<sub>2A</sub>R oligomerization to functional roles of the  
460 receptor(109). From a structural biology standpoint, visualizing the multiple oligomeric interfaces  
461 of A<sub>2A</sub>R in the presence of the full-length C-terminus is key to investigating whether these  
462 interfaces give rise to different oligomer functions.

## 463 **MATERIALS AND METHODS**

### 464 *Cloning, Gene Expression, and Protein Purification*

465 The multi-integrating pITy plasmid(110), previously used for overexpression of A<sub>2A</sub>R in  
466 *Saccharomyces cerevisiae*(111), was employed in this study. pITy contains a Gal1–10 promoter

467 for galactose-induced expression, a synthetic pre-pro leader sequence which directs protein  
468 trafficking(112, 113), and the yeast alpha terminator. The genes encoding A<sub>2A</sub>R variants with 10-  
469 His C-terminal tag were cloned into pITy downstream of the pre-pro leader sequence, using either  
470 splice overlapping extension(114) or USER cloning using X7 polymerase(115, 116), with primers  
471 provided in **Table S3**. The plasmids were then transformed into *S. cerevisiae* strain BJ5464  
472 (MAT $\alpha$  ura3-52 trp1 leu2 $\Delta$ 1 his3 $\Delta$ 200 pep4::HIS3 prb1 $\Delta$ 1.6R can1 GAL) (provided by the lab of  
473 Anne Robinson at Carnegie Mellon University) using the lithium-acetate/PEG method(117).  
474 Transformants were selected on YPD G-418 plates (1% yeast extract, 2% peptone, 2% dextrose,  
475 2.0 mg/mL G-418).

476 Receptor was expressed and purified following the previously described protocol(118). In brief,  
477 from freshly streaked YPD plates (1% yeast extract, 2% peptone, 2% dextrose), single colonies  
478 were grown in 5-mL YPD cultures over night at 30°C. From these 5-mL cultures, 50-mL cultures  
479 were grown with a starting OD of 0.5 over night at 30°C. To induce expression, yeast cells from  
480 these 50-mL cultures were centrifuged at 3,000  $x$  g to remove YPD before resuspended in YPG  
481 medium (1% yeast, 2% peptone, 2% D-galactose) at a starting OD of 0.5. The receptor was  
482 expressed for 24 hours over night at 30°C with 250 r.p.m shaking. Cells were pelleted by  
483 centrifugation at 3,000  $x$  g, washed in sterile PBS buffer, and pelleted again before storage at –  
484 80°C until purification.

485 Mechanical bead lysis of cells was done, per 250 mL of cell culture, by performing 12 pulses of  
486 60 s intense vortexing (with at least 60 s of rest in between pulses) in 10 mL 0.5-mm zirconia silica  
487 beads (BioSpec, Bartlesville, OK, USA; #11079105z), 25 mL of lysis buffer (50 mM sodium  
488 phosphate, 300 mM sodium chloride, 10% (v/v) glycerol, pH = 8.0, 2% (w/v) n-Dodecyl- $\beta$ -D-  
489 maltopyranoside (DDM; Anatrace, Maumee, OH, USA; #D310), 1% (w/v) 3-[(3-  
490 Cholamidopropyl)dimethylammonio]-1-propanesulfonate (CHAPS; Anatrace; #C216), and 0.2%  
491 (w/v) cholesteryl hemisuccinate (CHS; Anatrace; #CH210) and an appropriate amount of 100x  
492 Pierce Halt EDTA-free protease inhibitor (Pierce, Rockford, IL, USA #78439)). Beads were  
493 separated using a Kontex column. Unlysed cells were removed by centrifugation at 3,220  $x$  g for  
494 10 min. Receptor was let solubilized on rotary mixer for 3 hours before cell debris was removed  
495 by centrifugation at 10,000  $x$  g for 30 min. Solubilized protein was incubated with Ni-NTA resin  
496 (Pierce; #88221) over night. Protein-resin mixture was then washed extensively in purification



497 buffer (50 mM sodium phosphate, 300 mM sodium chloride, 10% (v/v) glycerol, 0.1% (w/v) DDM,  
498 0.1% (w/v) CHAPS and 0.2% (w/v) CHS, pH = 8.0) containing low imidazole concentrations (20–  
499 50 mM). A<sub>2A</sub>R was eluted into purification buffer containing 500 mM imidazole. Prior to further  
500 chromatographic purification, imidazole was removed using a PD-10 desalting column (GE  
501 Healthcare, Pittsburgh, PA, USA; # 17085101).

502 Ligand affinity resin was prepared as previously described for purification of active A<sub>2A</sub>R.(119)  
503 (120) In brief, 8 mL of isopropanol-washed Affigel 10 resin (BioRad; # 1536099) was mixed  
504 gently in an Erlenmeyer flask for 20 h at room temperature with 48 mL of DMSO containing 24  
505 mg of xanthine amine congener (XAC, high-affinity A<sub>2A</sub>R antagonist, K<sub>D</sub> = 32 nM; Sigma, St.  
506 Louis, MO, USA; #X103). The absorbance at 310 nm of the XAC-DMSO solution before and after  
507 the coupling reaction was measured in 10 mM HCl and compared to a standard curve. The amount  
508 of resin bound to ligand was estimated to be 5.6 μM. The coupling reaction was quenched by  
509 washing the resin with DMSO, then with Tris-HCl 50 mM (pH = 7.4), then with 20% (v/v) ethanol.  
510 The resin was packed into a Tricorn 10/50 column (GE Healthcare) under pressure via a BioRad  
511 Duoflow FPLC (BioRad).

512 For purification of active A<sub>2A</sub>R, the column was equilibrated with 4 CV of purification buffer. The  
513 IMAC-purified A<sub>2A</sub>R was desalted and diluted to 5.5 mL before applied to a 5-mL sample loop on  
514 the BioRad Duoflow FPLC, from which the sample was loaded onto the column at a rate of 0.1  
515 mL/min. Inactive A<sub>2A</sub>R was washed from the column by flowing 10 mL of purification buffer at  
516 0.2 mL/min, followed by 16 mL at 0.4 mL/min. Active A<sub>2A</sub>R was eluted from the column by  
517 flowing purification buffer containing 20 mM theophylline (low-affinity A<sub>2A</sub>R antagonist, K<sub>D</sub> =  
518 1.6 μM; Sigma, St. Louis, MO, USA; #T1633). Western blot analysis was performed to determine  
519 4-mL fractions with active A<sub>2A</sub>R collected with a BioFrac fraction collector (BioRad; Hercules,  
520 CA, USA), which were then concentrated through a 30-kDa MWCO centrifugal filter (Millipore,  
521 Billerica, MA, USA; # UFC803096) and desalted to remove excess theophylline. For the  
522 experiments where the salt concentrations were varied, the buffer exchange was done also by this  
523 last desalting step.

#### 524 *Size-Exclusion Chromatography*



525 To separate oligomeric species of active A<sub>2A</sub>R, a prepacked Tricorn Superdex 200 10/300 GL  
526 column (GE Healthcare) connected to a BioRad Duoflow FPLC was equilibrated with 60 mL of  
527 running buffer (150 mM sodium chloride, 50 mM sodium phosphate, 10% (v/v) glycerol, 0.1%  
528 (w/v) DDM, 0.1% (w/v) CHAPS, 0.02% (w/v) CHS, pH = 8.0) at a flow rate of 0.2 mL/min. 0.5-  
529 mL fractions were collected with a BioFrac fraction collector in 30 mL of running buffer at the  
530 same flow rate. Analysis of SDS/PAGE and western blot was done to determine oligomeric states  
531 of the eluted A<sub>2A</sub>R.

### 532 *SEC Peak Analysis*

533 SEC chromatograms were analyzed using OriginLab using the nonlinear curve fit (Gaussian)  
534 function. The area under the curve and the peak width were manually defined in cases where the  
535 SNR of the SEC trace were too low. The R<sup>2</sup> values reached > 0.96 for most cases. The population  
536 of each oligomeric species was expressed as the integral of each Gaussian this curve fit of the SEC  
537 signal. The HMW oligomer peak in some cases could not be fitted with one curve and thus was  
538 fitted with two curves instead. The reported standard errors were calculated from the variance of  
539 the fit and did not correspond to experimental errors. The results are detailed in **Fig. S2** and **Table**  
540 **S1**.

### 541 *SDS-PAGE and Western Blotting*

542 10% SDS-PAGE gels were hand-casted in BioRad Criterion empty cassettes (BioRad; #3459902,  
543 3459903). Lysate controls were prepared by lysis of 5 OD cell pellets with 35  $\mu$ L of YPER (Fisher  
544 Scientific, Waltham, MA, USA # 8990) at RT for 20 min, incubation with 2x Laemmli buffer (4%  
545 (w/v) SDS, 16% (v/v) glycerol, 0.02% (w/v) bromophenol blue, 167 M Tris, pH 6.8) at 37°C for  
546 1 h, and centrifugation at 3,000  $\times$  g for 1 min to pellet cell debris. Protein samples were prepared  
547 by incubation with 2x Laemmli buffer at 37°C for 30 min. For all samples, 14  $\mu$ L (for 26-well gel)  
548 or 20  $\mu$ L (for 18-well gel) was loaded per lane, except for 7  $\mu$ L of Magic Mark XP Western protein  
549 ladder (Thermo Scientific, Waltham, MA, USA; # LC5602) as a standard. Electrophoresis was  
550 carried out at 120 V for 100 min. Proteins were transferred to 0.2- $\mu$ m nitrocellulose membranes  
551 (BioRad; # 170-4159) via electroblotting using a BioRad Transblot Turbo, mixed MW protocol.  
552 Membranes were blocked in Tris-buffered saline with Tween (TBST; 150 mM sodium chloride,

553 15.2 mM Tris-HCl, 4.6 mM Tris base, pH = 7.4, 0.1% (v/v) Tween 20 (BioRad; # 1706531))  
554 containing 5% (w/v) dry milk, then probed with anti-A<sub>2A</sub>R antibody, clone 7F6-G5-A2 (Millipore,  
555 Burlington, MA, USA; # 05-717) at 1:500 in TBST with 0.5% (w/v) dry milk. Probing with  
556 secondary antibody was done with a fluorescent DyLight 550 antibody (Abcam, Cambridge, MA,  
557 USA; ab96880) at 1:600 in TBST containing 0.5% (w/v) milk.

558 Western blot was analyzed with Fiji. The Gels analysis plugin was used to define each sample lane,  
559 and to generate an intensity profile. Peaks were manually selected and integrated with the measure  
560 tool to determine the amount of protein present.

### 561 *Coarse-Grained MD Simulations*

562 Initial configuration of A<sub>2A</sub>R was based on the crystal structure of the receptor in the active state  
563 (PDB 5G53). All non-receptor components were removed, and missing residues added using  
564 MODELLER 9.23(121). Default protonation states of ionizable residues were used. The resulting  
565 structure was converted to MARTINI coarse-grained topology using the martinize.py script(122).  
566 The ELNeDyn elastic network(123) was used to constrain protein secondary and tertiary structures  
567 with a force constant of 500 kJ/mol/nm<sup>2</sup> and a cutoff of 1.5 nm. To optimize loop refinement of  
568 the model, a single copy was embedded in a 1-palmitoyl-2-oleoyl-sn-glycero-3-phosphocholine  
569 (POPC) bilayer using the insane.py script, solvated with MARTINI polarizable water, neutralized  
570 with 0.15 M NaCl, and a short MD (1.5 μs) run to equilibrate the loop regions. Subsequently, two  
571 monomers of the equilibrated A<sub>2A</sub>R were randomly rotated and placed at the center of a 13 nm ×  
572 13 nm × 11 nm (xyz) box, 3.5 nm apart, with their principal transmembrane axis aligned parallel  
573 to the z axis. The proteins were then embedded in a POPC bilayer using the insane.py script.  
574 Sodium and chloride ions were added to neutralize the system and obtain a concentration of 0.15  
575 M NaCl. Total system size was typically in the range of 34,000 CG particles, with a 280:1  
576 lipid:protein ratio. Ten independent copies were generated for each A<sub>2A</sub>R truncated variant.

577 v2.2 of the MARTINI coarse-grained force field(124) was used for the protein and water, and v2.0  
578 was used for POPC. All coarse-grained simulations were carried out in GROMACS 2016(125) in  
579 the NPT ensemble (P = 1 atm, T = 310 K). The Bussi velocity rescaling thermostat was used for  
580 temperature control with a coupling constant of  $\tau_t = 1.0$  ps(126), while the Parrinello-

581 Rahman barostat(127) was used to control the pressure semi-isotropically with a coupling constant  
582 of  $\tau_t = 12.0$  ps and compressibility of  $3 \times 10^{-4}$  bar<sup>-1</sup>. Reaction field electrostatics was used with  
583 Coulomb cut-off of 1.1 nm. Non-bonded Lennard-Jones interactions were treated with a cut-off of  
584 1.1 nm. All simulations were run with a 15 fs timestep, updating neighbor lists every 10 steps.  
585 Cubic periodic boundary conditions along the x, y and z axes were used. Each simulation was run  
586 for 8  $\mu$ s.

### 587 *Atomistic MD Simulations*

588 Three snapshots of symmetric dimers of A<sub>2</sub>A<sub>R</sub> for each respective truncated variant were randomly  
589 selected from the CG simulations as starting structures for backmapping. Coarse-grained systems  
590 were converted to atomistic resolution using the backward.py script(128). All simulations were  
591 run in Gromacs2019 in the *NPT* ensemble ( $P = 1$  bar,  $T = 310$  K) with all bonds restrained using  
592 the LINCS method(129). The Parrinello-Rahman barostat was used to control the pressure semi-  
593 isotropically with a coupling constant of  $\tau_t = 1.0$  ps and a compressibility of  $4.5 \times 10^{-5}$  bar<sup>-1</sup>, while  
594 the Bussi velocity rescaling thermostat was used for temperature control with a coupling constant  
595 of  $\tau_t = 0.1$  ps. Proteins, lipids, and solvents were separately coupled to the thermostat. The  
596 CHARMM36 and TIP3P force fields(130, 131) were used to model all molecular interactions.  
597 Periodic boundary conditions were set in the x, y, and z directions. Particle mesh Ewald (PME)  
598 electrostatics was used with a cut-off of 1.0 nm. A 2-fs time step was used for all atomistic runs,  
599 and each simulation was run for 50 ns.

### 600 *Analysis of Computational Results*

601 All trajectories were post-processed using gromacs tools and in-house scripts. We ran a clustering  
602 analysis of all dimer frames from the CG simulations using Daura et. al.'s clustering algorithm(132)  
603 implemented in GROMACS, with an RMSD cutoff of 1.5 Å. (An interface was considered dimeric  
604 if the minimum center of mass distance between the protomers was less than 5 Å.) This method  
605 uses an RMSD cutoff to group all conformations with the largest number of neighbors into a cluster  
606 and eliminates these from the pool, then repeats the process until the pool is empty. We focused  
607 our analysis on the most populated cluster from each truncated variant. Electrostatic interactions  
608 in the dimer were calculated from CG systems with LOOS(133) using a distance cutoff of 5.0 Å.

609 Transmembrane helical tilt angles were also calculated in LOOS from CG simulations. Hydrogen  
610 bonds were calculated from AA simulations using the hydrogen bonds plugin in VMD(134), with  
611 a distance cutoff of 3.5 Å and an angle cutoff of 20°. Only C-terminal residues were included in  
612 hydrogen bond analysis. PyMOL(135) was used for molecular visualizations.

### 613 *Assessing A<sub>2A</sub>R Oligomerization with Increasing Ionic Strength*

614 Na<sub>2</sub>HPO<sub>4</sub> and NaH<sub>2</sub>PO<sub>4</sub> in the buffer make up an ionic strength of 0.15 M, to which NaCl was  
615 added to increase the ionic strength to 0.45 M and furthermore to 0.95 M. The A<sub>2A</sub>R variants were  
616 purified at 0.45 M ionic strength and then exchanged into buffers of different ionic strengths using  
617 a PD-10 desalting column prior to subjecting the samples to SEC. The buffer composition is  
618 detailed below.

| <i>Buffers</i>               | <i>Components</i>                | <i>Conc.</i><br><i>(mM)</i> | <i>Ionic Strength</i><br><i>(mM)</i> |
|------------------------------|----------------------------------|-----------------------------|--------------------------------------|
| <i>0.15 M Ionic Strength</i> | <b>NaCl</b>                      | <b>0</b>                    | <b>0</b>                             |
|                              | NaH <sub>2</sub> PO <sub>4</sub> | 4                           | 4                                    |
|                              | Na <sub>2</sub> HPO <sub>4</sub> | 49                          | 146                                  |
| <i>0.45 M Ionic Strength</i> | <b>NaCl</b>                      | <b>300</b>                  | <b>300</b>                           |
|                              | NaH <sub>2</sub> PO <sub>4</sub> | 4                           | 4                                    |
|                              | Na <sub>2</sub> HPO <sub>4</sub> | 49                          | 146                                  |
| <i>0.95 M Ionic Strength</i> | <b>NaCl</b>                      | <b>800</b>                  | <b>800</b>                           |
|                              | NaH <sub>2</sub> PO <sub>4</sub> | 4                           | 4                                    |
|                              | Na <sub>2</sub> HPO <sub>4</sub> | 49                          | 146                                  |

619 **Table 1.** Calculations regarding composition of the buffers used in the experiments where salt concentrations are  
620 varied. Only NaCl concentration (in bold) is varied to achieve the different ionic strengths.

### 621 *Isolated C-Terminus Purification*

622 *Escherichia coli* BL21 (DE3) cells were transfected with pET28a DNA plasmids containing the  
623 desired A<sub>2A</sub>R sequence with a 6x His tag attached for purification. Cells from glycerol stock were  
624 grown in 10 mL luria broth (LB, Sigma Aldrich, L3022) overnight at 37°C and then used to  
625 inoculate 1 L of fresh LB and 10 µg/mL kanamycin (Fisher Scientific, BP906). Growth of cells  
626 were performed at 37°C, 200 rpm until optical density at λ = 600 nm reached 0.6–0.8. Expression  
627 was induced by incubation with 1 mM isopropyl-β-D-thiogalactoside (Fisher Bioreagents,  
628 BP175510) for 3 hrs.

629 Cells were harvested with centrifugation at 5000 rpm for 30 min. Harvested cells were resuspended  
630 in 25 mL Tris-HCl, pH = 7.4, 100 mM NaCl, 0.5 mM DTT, 0.1 mM EDTA with 1 Pierce protease  
631 inhibitor tablet (Thermo Scientific, A32965), 1 mM PMSF, 2 mg/mL lysozyme, 20  $\mu$ g/mL DNase  
632 (Sigma, DN25) and 10 mM MgCl<sub>2</sub>, and incubated on ice for 30 min. Samples were then incubated  
633 at 30°C for 20 minutes, then flash frozen and thawed 3 times in LN<sub>2</sub>. Samples were then centrifuged  
634 at 10,000 rpm for 10 min to remove cell debris. 1 mM PMSF was added again and the resulting  
635 supernatant was incubated while rotating for at least 4 hrs with Ni-NTA resin. The resin was loaded  
636 to a column and washed with 25 mL 20 mM sodium phosphate, pH = 7.0, 1 M NaCl, 20 mM  
637 imidazole, 0.5 mM DTT, 100  $\mu$ M EDTA. Purified protein was eluted with 15 mL of 20 mM sodium  
638 phosphate, pH = 7.0, 0.5 mM DTT, 100 mM NaCl, 300 mM imidazole. The protein was  
639 concentrated to a volume of 2.5mL and was buffer exchanged into 20 mM ammonium acetate  
640 buffer, pH = 7.4, 100 mM NaCl using a GE PD-10 desalting column. Purity of sample was  
641 confirmed with SDS-PAGE and western blot.

#### 642 *Aggregation Assay to Assess A<sub>2A</sub>R C-Terminus Assembly*

643 Absorbance was measured at 450 nm using a Shimadzu UV-1601 spectrophotometer with 120  $\mu$ L  
644 sample size. Prior to reading, samples were incubated at 40°C for 5 minutes. Samples were  
645 vigorously pipetted to homogenize any precipitate before absorbance was measured. Protein  
646 concentration was 50  $\mu$ M in a 20 mM ammonium acetate buffer (pH = 7.4).

#### 647 *Differential Scanning Fluorimetry (DSF)*

648 DSF was conducted with a Bio-rad CFX90 real-time PCR machine. A starting temperature 20°C  
649 was increased at a rate of 0.5°C per 30 seconds to a final temperature of 85°C. All samples  
650 contained 40  $\mu$ L of 40  $\mu$ M A<sub>2A</sub>R C-terminus, 9x SYPRO orange (ThermoFisher S6650), 200 mM  
651 NaCl, and 20 mM MES. Fluorescence was detected in real-time at 570 nm. All samples were  
652 conducted in triplicate.

#### 653 *Hydrophobicity and Charge Profile of C-Terminus*

654 The hydrophobicity profile reported in **Fig. S4** was determined with ProtScale using method  
655 described by Kyte & Doolittle(136), window size of 3.

656 **FUNDING AND ACKNOWLEDGMENTS**

657 This material is based upon work supported by (1) the National Institute of General Medical  
658 Sciences of the National Institutes of Health under Award Number R35GM136411, (2) the  
659 National Institute of Mental Health of the National Institutes of Health under Small Business  
660 Innovation Research Award Number 1R43MH119906-01, and (3) the National Science  
661 Foundation under Award Number MCB-1714888 (E.S. and B.M.). The content is solely the  
662 responsibility of the authors and does not necessarily represent the official views of the National  
663 Institutes of Health. Many of the experiments were completed with the assistance from Rohan  
664 Katpally. The pITy expression vector and *S. cerevisiae* BJ5464 strain were generously provided  
665 by Prof. Anne Robinson's lab at Carnegie Mellon University. The X7 polymerase was a gift from  
666 Dr. Morten Nørholm, Novo Nordisk Foundation Center for Biosustainability, Technical  
667 University of Denmark. Computational time was provided through WVU Research Computing  
668 and XSEDE allocation no. TG-MCB130040.

669 **REFERENCES**

- 670 1. L. El-Asmar, *et al.*, Evidence for Negative Binding Cooperativity within CCR5-CCR2b  
671 Heterodimers. *Mol. Pharmacol.* **67**, 460–469 (2005).
- 672 2. V. Casadó-Anguera, *et al.*, Evidence for the heterotetrameric structure of the adenosine A2A–  
673 dopamine D2 receptor complex. *Biochem. Soc. Trans.* **44**, 595–600 (2016).
- 674 3. X. Guitart, *et al.*, Functional Selectivity of Allosteric Interactions within G Protein–Coupled  
675 Receptor Oligomers: The Dopamine D<sub>1</sub>-D<sub>3</sub> Receptor Heterotetramer. *Mol. Pharmacol.*  
676 **86**, 417–429 (2014).
- 677 4. K. Yoshioka, O. Saitoh, H. Nakata, Heteromeric association creates a P2Y-like adenosine  
678 receptor. *Proc. Natl. Acad. Sci.* **98**, 7617–7622 (2001).
- 679 5. S. Cristóvão-Ferreira, *et al.*, A1R–A2AR heteromers coupled to Gs and Gi/o proteins  
680 modulate GABA transport into astrocytes. *Purinergic Signal.* **9**, 433–449 (2013).
- 681 6. A. Cordoní, G. Navarro, M. S. Aymerich, R. Franco, Structures for G-Protein-Coupled  
682 Receptor Tetramers in Complex with G Proteins. *Trends Biochem. Sci.* **40**, 548–551  
683 (2015).
- 684 7. J. González-Maeso, *et al.*, Hallucinogens Recruit Specific Cortical 5-HT<sub>2A</sub> Receptor–  
685 Mediated Signaling Pathways to Affect Behavior. *Neuron* **53**, 439–452 (2007).
- 686 8. S. P. Lee, *et al.*, Dopamine D1 and D2 Receptor Co-activation Generates a Novel  
687 Phospholipase C-mediated Calcium Signal. *J. Biol. Chem.* **279**, 35671–35678 (2004).
- 688 9. A. J. Rashid, *et al.*, D1-D2 dopamine receptor heterooligomers with unique pharmacology are  
689 coupled to rapid activation of Gq/11 in the striatum. *Proc. Natl. Acad. Sci.* **104**, 654–659  
690 (2007).
- 691 10. H. Liu, *et al.*, Heterodimerization of the kappa opioid receptor and neurotensin receptor 1  
692 contributes to a novel  $\beta$ -arrestin-2–biased pathway. *Biochim. Biophys. Acta BBA - Mol.*  
693 *Cell Res.* **1863**, 2719–2738 (2016).
- 694 11. S. Hilairet, M. Bouaboula, D. Carrière, G. Le Fur, P. Casellas, Hypersensitization of the  
695 Orexin 1 Receptor by the CB1 Receptor: EVIDENCE FOR CROSS-TALK BLOCKED  
696 BY THE SPECIFIC CB1 ANTAGONIST, SR141716. *J. Biol. Chem.* **278**, 23731–23737  
697 (2003).
- 698 12. R. Rozenfeld, L. A. Devi, Receptor heterodimerization leads to a switch in signaling:  $\beta$ -  
699 arrestin2-mediated ERK activation by  $\mu$ - $\delta$  opioid receptor heterodimers. *FASEB J.* **21**,  
700 2455–2465 (2007).
- 701 13. D. O. Borroto-Escuela, *et al.*, Galanin receptor-1 modulates 5-hydroxytryptamine-1A  
702 signaling via heterodimerization. *Biochem. Biophys. Res. Commun.* **393**, 767–772 (2010).



- 703 14. D. Ecke, *et al.*, Hetero-oligomerization of the P2Y<sub>11</sub> receptor with the P2Y<sub>1</sub> receptor  
704 controls the internalization and ligand selectivity of the P2Y<sub>11</sub> receptor. *Biochem. J.* **409**,  
705 107–116 (2008).
- 706 15. L. Stanasila, J.-B. Perez, H. Vogel, S. Cotecchia, Oligomerization of the  $\alpha_{1a}$  - and  $\alpha_{1b}$  -  
707 Adrenergic Receptor Subtypes: POTENTIAL IMPLICATIONS IN RECEPTOR  
708 INTERNALIZATION. *J. Biol. Chem.* **278**, 40239–40251 (2003).
- 709 16. O. Faklaris, *et al.*, Multicolor time-resolved Förster resonance energy transfer  
710 microscopy reveals the impact of GPCR oligomerization on internalization processes.  
711 *FASEB J.* **29**, 2235–2246 (2015).
- 712 17. S. Takeda, S. Kadowaki, T. Haga, H. Takaesu, S. Mitaku, Identification of G protein-  
713 coupled receptor genes from the human genome sequence. *FEBS Lett.* **520**, 97–101  
714 (2002).
- 715 18. R. T. Dorsam, J. S. Gutkind, G-protein-coupled receptors and cancer. *Nat. Rev. Cancer* **7**,  
716 79–94 (2007).
- 717 19. B. Farran, An update on the physiological and therapeutic relevance of GPCR oligomers.  
718 *Pharmacol. Res.* **117**, 303–327 (2017).
- 719 20. N. S. Schonenbach, S. Hussain, M. A. O’Malley, Structure and function of G protein-  
720 coupled receptor oligomers: implications for drug discovery: Studying GPCR Oligomer  
721 Function. *Wiley Interdiscip. Rev. Nanomed. Nanobiotechnol.* **7**, 408–427 (2015).
- 722 21. S. Ferré, *et al.*, G Protein–Coupled Receptor Oligomerization Revisited: Functional and  
723 Pharmacological Perspectives. *Pharmacol. Rev.* **66**, 413–434 (2014).
- 724 22. H. Bräuner-Osborne, P. Wellendorph, A. A. Jensen, "Structure, Pharmacology and  
725 Therapeutic Prospects of Family C G-Protein Coupled Receptors" in *Current Drug*  
726 *Targets.* (Bentham 2007), pp 169–184(16).
- 727 23. S. R. George, B. F. O’Dowd, S. P. Lee, G-Protein-coupled receptor oligomerization and  
728 its potential for drug discovery. *Nat. Rev. Drug Discov.* **1**, 808–820 (2002).
- 729 24. W. Song, A. L. Duncan, M. S. P. Sansom, “GPCR Oligomerisation Modulation by  
730 Conformational State and Lipid Interactions Revealed by MD Simulations and Markov  
731 Models” (Biophysics, 2020) <https://doi.org/10.1101/2020.06.24.168260> (July 22, 2020).
- 732 25. A. Ghosh, U. Sonavane, R. Joshi, Multiscale modelling to understand the self-assembly  
733 mechanism of human  $\beta_2$ -adrenergic receptor in lipid bilayer. *Comput. Biol. Chem.* **48**,  
734 29–39 (2014).
- 735 26. X. Periole, A. M. Knepp, T. P. Sakmar, S. J. Marrink, T. Huber, Structural Determinants  
736 of the Supramolecular Organization of G Protein-Coupled Receptors in Bilayers. *J. Am.*  
737 *Chem. Soc.* **134**, 10959–10965 (2012).

- 738 27. F. Fanelli, A. Felling, Dimerization and ligand binding affect the structure network of  
739 A2A adenosine receptor. *Biochim. Biophys. Acta BBA - Biomembr.* **1808**, 1256–1266  
740 (2011).
- 741 28. W. Liu, *et al.*, Structural Basis for Allosteric Regulation of GPCRs by Sodium Ions.  
742 *Science* **337**, 232–236 (2012).
- 743 29. J. Huang, S. Chen, J. J. Zhang, X.-Y. Huang, Crystal structure of oligomeric  $\beta$ 1-  
744 adrenergic G protein-coupled receptors in ligand-free basal state. *Nat. Struct. Mol. Biol.*  
745 **20**, 419–425 (2013).
- 746 30. A. Manglik, *et al.*, Crystal structure of the  $\mu$ -opioid receptor bound to a morphinan  
747 antagonist. *Nature* **485**, 321–326 (2012).
- 748 31. T. S. Thorsen, R. Matt, W. I. Weis, B. K. Kobilka, Modified T4 Lysozyme Fusion  
749 Proteins Facilitate G Protein-Coupled Receptor Crystallography. *Structure* **22**, 1657–  
750 1664 (2014).
- 751 32. D. Fotiadis, *et al.*, Structure of the rhodopsin dimer: a working model for G-protein-  
752 coupled receptors. *Curr. Opin. Struct. Biol.* **16**, 252–259 (2006).
- 753 33. D. Fotiadis, *et al.*, Atomic-force microscopy Rhodopsin dimers in native disc  
754 membranes. *Nature* **421**, 127–128 (2003).
- 755 34. Y. Liang, *et al.*, Organization of the G Protein-coupled Receptors Rhodopsin and Opsin  
756 in Native Membranes. *J. Biol. Chem.* **278**, 21655–21662 (2003).
- 757 35. L. Xue, *et al.*, Major ligand-induced rearrangement of the heptahelical domain interface  
758 in a GPCR dimer. *Nat. Chem. Biol.* **11**, 134–140 (2015).
- 759 36. P. M. Dijkman, *et al.*, Dynamic tuneable G protein-coupled receptor monomer-dimer  
760 populations. *Nat. Commun.* **9**, 1710 (2018).
- 761 37. S. Asakura, F. Oosawa, Interaction between particles suspended in solutions of  
762 macromolecules. *J. Polym. Sci.* **33**, 183–192 (1958).
- 763 38. A. G. Yodh, *et al.*, Entropically driven self-assembly and interaction in suspension.  
764 *Philos. Trans. R. Soc. Lond. Ser. Math. Phys. Eng. Sci.* **359**, 921–937 (2001).
- 765 39. D. Marenduzzo, K. Finan, P. R. Cook, The depletion attraction: an underappreciated  
766 force driving cellular organization. *J. Cell Biol.* **175**, 681–686 (2006).
- 767 40. S. Milles, N. Salvi, M. Blackledge, M. R. Jensen, Characterization of intrinsically  
768 disordered proteins and their dynamic complexes: From in vitro to cell-like  
769 environments. *Prog. Nucl. Magn. Reson. Spectrosc.* **109**, 79–100 (2018).

- 770 41. B. I. M. Wicky, S. L. Shamma, J. Clarke, Affinity of IDPs to their targets is modulated  
771 by ion-specific changes in kinetics and residual structure. *Proc. Natl. Acad. Sci.* **114**,  
772 9882–9887 (2017).
- 773 42. Cs. Szasz, *et al.*, Protein Disorder Prevails under Crowded Conditions. *Biochemistry* **50**,  
774 5834–5844 (2011).
- 775 43. D. P. Goldenberg, B. Argyle, Minimal Effects of Macromolecular Crowding on an  
776 Intrinsically Disordered Protein: A Small-Angle Neutron Scattering Study. *Biophys. J.*  
777 **106**, 905–914 (2014).
- 778 44. S. Qin, H.-X. Zhou, Effects of Macromolecular Crowding on the Conformational  
779 Ensembles of Disordered Proteins. *J. Phys. Chem. Lett.* **4**, 3429–3434 (2013).
- 780 45. E. A. Cino, M. Karttunen, W.-Y. Choy, Effects of Molecular Crowding on the Dynamics  
781 of Intrinsically Disordered Proteins. *PLoS ONE* **7**, e49876 (2012).
- 782 46. A. Soranno, *et al.*, Single-molecule spectroscopy reveals polymer effects of disordered  
783 proteins in crowded environments. *Proc. Natl. Acad. Sci.* **111**, 4874–4879 (2014).
- 784 47. F. Zosel, A. Soranno, K. J. Buholzer, D. Nettels, B. Schuler, Depletion interactions  
785 modulate the binding between disordered proteins in crowded environments. *Proc. Natl.*  
786 *Acad. Sci.* **117**, 13480–13489 (2020).
- 787 48. N. F. A. van der Vegt, D. Nayar, The Hydrophobic Effect and the Role of Cosolvents. *J.*  
788 *Phys. Chem. B* **121**, 9986–9998 (2017).
- 789 49. W. Kunz, J. Henle, B. W. Ninham, ‘Zur Lehre von der Wirkung der Salze’ (about the  
790 science of the effect of salts): Franz Hofmeister’s historical papers. *Curr. Opin. Colloid*  
791 *Interface Sci.* **9**, 19–37 (2004).
- 792 50. L. Tovo-Rodrigues, A. Roux, M. H. Hutz, L. A. Rohde, A. S. Woods, Functional  
793 characterization of G-protein-coupled receptors: A bioinformatics approach.  
794 *Neuroscience* **277**, 764–779 (2014).
- 795 51. V.-P. Jaakola, J. Prilusky, J. L. Sussman, A. Goldman, G protein-coupled receptors show  
796 unusual patterns of intrinsic unfolding. *Protein Eng. Des. Sel.* **18**, 103–110 (2005).
- 797 52. J. Garcia-Nafria, Y. Lee, X. Bai, B. Carpenter, C. G. Tate, Cryo-EM structure of the  
798 adenosine A<sub>2A</sub> receptor coupled to an engineered heterotrimeric G protein. *eLife* **7**,  
799 e35946 (2018).
- 800 53. B. Sun, *et al.*, Crystal structure of the adenosine A<sub>2A</sub> receptor bound to an antagonist  
801 reveals a potential allosteric pocket. *Proc. Natl. Acad. Sci.* **114**, 2066–2071 (2017).
- 802 54. G. Lebon, *et al.*, Agonist-bound adenosine A<sub>2A</sub> receptor structures reveal common  
803 features of GPCR activation. *Nature* **474**, 521–525 (2011).

- 804 55. F. Xu, *et al.*, Structure of an Agonist-Bound Human A<sub>2A</sub> Adenosine Receptor. **332**, 7  
805 (2011).
- 806 56. A. S. Doré, *et al.*, Structure of the Adenosine A<sub>2A</sub> Receptor in Complex with ZM241385  
807 and the Xanthines XAC and Caffeine. *Structure* **19**, 1283–1293 (2011).
- 808 57. V.-P. Jaakola, *et al.*, The 2.6 Angstrom Crystal Structure of a Human A<sub>2A</sub> Adenosine  
809 Receptor Bound to an Antagonist. *Science* **322**, 1211–1217 (2008).
- 810 58. B. Carpenter, R. Nehmé, T. Warne, A. G. W. Leslie, C. G. Tate, Structure of the  
811 adenosine A<sub>2A</sub> receptor bound to an engineered G protein. *Nature* **536**, 104–107 (2016).
- 812 59. T. Hino, *et al.*, G-protein-coupled receptor inactivation by an allosteric inverse-agonist  
813 antibody. *Nature* **482**, 237–240 (2012).
- 814 60. K. S. Koretz, C. McGraw, A. S. Robinson, Characterization of A<sub>2A</sub>R and G Protein  
815 Coupling by Surface Plasmon Resonance. *Biophys. J.* **118**, 162a (2020).
- 816 61. G. Navarro, *et al.*, Cross-communication between G<sub>i</sub> and G<sub>s</sub> in a G-protein-coupled  
817 receptor heterotetramer guided by a receptor C-terminal domain. *BMC Biol.* **16** (2018).
- 818 62. A. Jain, C. McGraw, A. Robinson, The Adenosine A<sub>1</sub> and A<sub>2A</sub> Receptor C-termini are  
819 Necessary for Activation but not the Specificity of Downstream Signaling  
820 <https://doi.org/10.22541/au.158532015.55605148> (November 24, 2020).
- 821 63. N. S. Schonenbach, M. D. Rieth, S. Han, M. A. O'Malley, Adenosine A<sub>2A</sub> receptors form  
822 distinct oligomers in protein detergent complexes. *FEBS Lett.* **590**, 3295–3306 (2016).
- 823 64. S. Cvejcic, L. A. Devi, Dimerization of the  $\delta$  Opioid Receptor: IMPLICATION FOR A  
824 ROLE IN RECEPTOR INTERNALIZATION. *J. Biol. Chem.* **272**, 26959–26964 (1997).
- 825 65. J. Burgueño, *et al.*, The Adenosine A<sub>2A</sub> Receptor Interacts with the Actin-binding  
826 Protein  $\alpha$ -Actinin. *J. Biol. Chem.* **278**, 37545–37552 (2003).
- 827 66. F. Ciruela, *et al.*, Combining Mass Spectrometry and Pull-Down Techniques for the  
828 Study of Receptor Heteromerization. Direct Epitope–Epitope Electrostatic Interactions  
829 between Adenosine A<sub>2A</sub> and Dopamine D<sub>2</sub> Receptors. *Anal. Chem.* **76**, 5354–5363  
830 (2004).
- 831 67. P. K. Grover, R. L. Ryall, Critical Appraisal of Salting-Out and Its Implications for  
832 Chemical and Biological Sciences. *Chem. Rev.* **105**, 1–10 (2005).
- 833 68. A. S. Thomas, A. H. Elcock, Molecular Dynamics Simulations of Hydrophobic  
834 Associations in Aqueous Salt Solutions Indicate a Connection between Water Hydrogen  
835 Bonding and the Hofmeister Effect. *J. Am. Chem. Soc.* **129**, 14887–14898 (2007).
- 836 69. G. Graziano, Hydrophobic interaction of two large plates: An analysis of salting-  
837 in/salting-out effects. *Chem. Phys. Lett.* **491**, 54–58 (2010).

- 838 70. R. Zangi, M. Hagen, B. J. Berne, Effect of Ions on the Hydrophobic Interaction between  
839 Two Plates. *J. Am. Chem. Soc.* **129**, 4678–4686 (2007).
- 840 71. J. Heyda, *et al.*, Guanidinium can both Cause and Prevent the Hydrophobic Collapse of  
841 Biomacromolecules. *J. Am. Chem. Soc.* **139**, 863–870 (2017).
- 842 72. R. L. Baldwin, How Hofmeister ion interactions affect protein stability. *Biophys. J.* **71**,  
843 2056–2063 (1996).
- 844 73. T. A. Larsen, A. J. Olson, D. S. Goodsell, Morphology of protein–protein interfaces.  
845 *Structure* **6**, 421–427 (1998).
- 846 74. C.-J. Tsai, R. Nussinov, Hydrophobic folding units at protein-protein interfaces:  
847 Implications to protein folding and to protein-protein association. *Protein Sci.* **6**, 1426–  
848 1437 (1997).
- 849 75. C.-J. Tsai, S. L. Lin, H. J. Wolfson, R. Nussinov, Studies of protein-protein interfaces: A  
850 statistical analysis of the hydrophobic effect: Protein-protein interfaces: The hydrophobic  
851 effect. *Protein Sci.* **6**, 53–64 (1997).
- 852 76. E. De Filippo, *et al.*, Role of extracellular cysteine residues in the adenosine A<sub>2A</sub>  
853 receptor. *Purinergic Signal.* **12**, 313–329 (2016).
- 854 77. A. N. Naranjo, *et al.*, Conserved disulfide bond is not essential for the adenosine A<sub>2A</sub>  
855 receptor: Extracellular cysteines influence receptor distribution within the cell and  
856 ligand-binding recognition. *Biochim. Biophys. Acta BBA - Biomembr.* **1848**, 603–614  
857 (2015).
- 858 78. M. A. O’Malley, A. N. Naranjo, T. Lazarova, A. S. Robinson, Analysis of Adenosine A<sub>2A</sub>  
859 a Receptor Stability: Effects of Ligands and Disulfide Bonds. *Biochemistry* **49**, 9181–  
860 9189 (2010).
- 861 79. L. Gama, S. G. Wilt, G. E. Breitwieser, Heterodimerization of Calcium Sensing  
862 Receptors with Metabotropic Glutamate Receptors in Neurons. *J. Biol. Chem.* **276**,  
863 39053–39059 (2001).
- 864 80. C. Romano, W.-L. Yang, K. L. O’Malley, Metabotropic Glutamate Receptor 5 Is a  
865 Disulfide-linked Dimer. *J. Biol. Chem.* **271**, 28612–28616 (1996).
- 866 81. F.-Y. Zeng, J. Wess, Identification and Molecular Characterization of m<sub>3</sub> Muscarinic  
867 Receptor Dimers. *J. Biol. Chem.* **274**, 19487–19497 (1999).
- 868 82. X. Zhu, J. Wess, Truncated V<sub>2</sub> Vasopressin Receptors as Negative Regulators of Wild-  
869 Type V<sub>2</sub> Receptor Function. *Biochemistry* **37**, 15773–15784 (1998).
- 870 83. M. Berthouze, *et al.*, Two transmembrane Cys residues are involved in 5-HT<sub>4</sub> receptor  
871 dimerization. *Biochem. Biophys. Res. Commun.* **356**, 642–647 (2007).

- 872 84. S. P. Lee, Z. Xie, B. F. O'Dowd, Oligomerization of Dopamine and Serotonin Receptors.  
873 *Neuropsychopharmacol.* **23**, S32–S40 (2000).
- 874 85. W. Guo, *et al.*, Dopamine D2 receptors form higher order oligomers at physiological  
875 expression levels. *EMBO J.* **27**, 2293–2304 (2008).
- 876 86. M. J. Saaranen, L. W. Ruddock, Disulfide Bond Formation in the Cytoplasm. *Antioxid.*  
877 *Redox Signal.* **19**, 46–53 (2013).
- 878 87. J. K. Locker, G. Griffiths, An Unconventional Role for Cytoplasmic Disulfide Bonds in  
879 Vaccinia Virus Proteins. *J. Cell Biol.* **144**, 267–279 (1999).
- 880 88. J. R. Gaut, L. M. Hendershot, The modification and assembly of proteins in the  
881 endoplasmic reticulum. *Curr. Opin. Cell Biol.* **5**, 589–595 (1993).
- 882 89. C. Hwang, A. Sinskey, H. Lodish, Oxidized redox state of glutathione in the endoplasmic  
883 reticulum. *Science* **257**, 1496–1502 (1992).
- 884 90. A. Helenius, T. Marquardt, I. Braakman, The endoplasmic reticulum as a protein-folding  
885 compartment. *Trends Cell Biol.* **2**, 227–231 (1992).
- 886 91. T. E. Creighton, D. A. Hillson, R. B. Freedman, Catalysis by protein-disulphide  
887 isomerase of the unfolding and refolding of proteins with disulphide bonds. *J. Mol. Biol.*  
888 **142**, 43–62 (1980).
- 889 92. G. Pándy-Szekeres, *et al.*, GPCRdb in 2018: adding GPCR structure models and ligands.  
890 *Nucleic Acids Res.* **46**, D440–D446 (2018).
- 891 93. R. S. Kasai, S. V. Ito, R. M. Awane, T. K. Fujiwara, A. Kusumi, The Class-A GPCR  
892 Dopamine D2 Receptor Forms Transient Dimers Stabilized by Agonists: Detection by  
893 Single-Molecule Tracking. *Cell Biochem. Biophys.* **76**, 29–37 (2018).
- 894 94. A. Tabor, *et al.*, Visualization and ligand-induced modulation of dopamine receptor  
895 dimerization at the single molecule level. *Sci. Rep.* **6** (2016).
- 896 95. J. Möller, *et al.*, Single-molecule analysis reveals agonist-specific dimer formation of  $\mu$ -  
897 opioid receptors. *Nat. Chem. Biol.* **16**, 946–954 (2020).
- 898 96. J.-P. Vilardaga, *et al.*, Conformational cross-talk between  $\alpha$ 2A-adrenergic and  $\mu$ -opioid  
899 receptors controls cell signaling. *Nat. Chem. Biol.* **4**, 126–131 (2008).
- 900 97. U. Golebiewska, J. M. Johnston, L. Devi, M. Filizola, S. Scarlata, Differential Response  
901 to Morphine of the Oligomeric State of  $\mu$ -Opioid in the Presence of  $\delta$ -Opioid Receptors.  
902 *Biochemistry* **50**, 2829–2837 (2011).
- 903 98. S. Armando, *et al.*, The chemokine CXCL4 and CXCR2 receptors form homo- and  
904 heterooligomers that can engage their signaling G-protein effectors and  $\beta$ arrestin. *FASEB*  
905 *J.* **28**, 4509–4523 (2014).



- 906 99. A. M. Bagher, R. B. Laprairie, J. T. Toguri, M. E. M. Kelly, E. M. Denovan-Wright,  
907 Bidirectional allosteric interactions between cannabinoid receptor 1 (CB1) and dopamine  
908 receptor 2 long (D2L) heterotetramers. *Eur. J. Pharmacol.* **813**, 66–83 (2017).
- 909 100. G. Navarro, *et al.*, Quaternary structure of a G-protein-coupled receptor heterotetramer in  
910 complex with Gi and Gs. *BMC Biol.* **14** (2016).
- 911 101. G. Navarro, *et al.*, Evidence for functional pre-coupled complexes of receptor heteromers  
912 and adenylyl cyclase. *Nat. Commun.* **9** (2018).
- 913 102. A. Codomí, G. Navarro, L. Pardo, R. Franco, “Structure of G-protein-coupled receptor  
914 heteromers” in *GPCRs*, (Elsevier, 2020), pp. 109–119.
- 915 103. P.-A. Vidi, J. Chen, J. M. K. Irudayaraj, V. J. Watts, Adenosine A<sub>2A</sub> receptors assemble  
916 into higher-order oligomers at the plasma membrane. *FEBS Lett.* **582**, 3985–3990 (2008).
- 917 104. M. T. Eddy, *et al.*, Allosteric Coupling of Drug Binding and Intracellular Signaling in the  
918 A<sub>2A</sub>. *Cell* **172**, 68–80.e12 (2018).
- 919 105. L. Sušac, M. T. Eddy, T. Didenko, R. C. Stevens, K. Wüthrich, A<sub>2A</sub> adenosine receptor  
920 functional states characterized by <sup>19</sup>F-NMR. *Proc. Natl. Acad. Sci.*, **115**, 12733–12738  
921 (2018).
- 922 106. R. S. Prosser, L. Ye, A. Pandey, A. Oraziotti, Activation processes in ligand-activated G  
923 protein-coupled receptors: A case study of the adenosine A<sub>2A</sub> receptor. *BioEssays* **39**,  
924 1700072 (2017).
- 925 107. L. Ye, N. Van Eps, M. Zimmer, O. P. Ernst, R. Scott Prosser, Activation of the A<sub>2A</sub>  
926 adenosine G-protein-coupled receptor by conformational selection. *Nature* **533**, 265–268  
927 (2016).
- 928 108. T. Mirzadegan, G. Benko, S. Filipek, K. Palczewski, Sequence Analyses of G-Protein-  
929 Coupled Receptors: Similarities to Rhodopsin. *Biochem.* **42**, 9.
- 930 109. V. V. Gurevich, E. V. Gurevich, How and why do GPCRs dimerize? *Trends Pharmacol.*  
931 *Sci.* **29**, 234–240 (2008).
- 932 110. R. N. Parekh, M. R. Shaw, K. D. Wittrup, An Integrating Vector for Tunable, High  
933 Copy, Stable Integration into the Dispersed Ty  $\delta$  Sites of *Saccharomyces cerevisiae*.  
934 *Biotechnol. Prog.* **12**, 16–21 (1996).
- 935 111. M. A. O’Malley, *et al.*, Progress toward heterologous expression of active G-protein-  
936 coupled receptors in *Saccharomyces cerevisiae* : Linking cellular stress response with  
937 translocation and trafficking. *Protein Sci.* **18**, 2356–2370 (2009).
- 938 112. J. M. Clements, G. H. Catlin, M. J. Price, R. M. Edwards, Secretion of human epidermal  
939 growth factor from *Saccharomyces cerevisiae* using synthetic leader sequences. *Gene*  
940 **106**, 267–271 (1991).



- 941 113. R. N. Parekh, K. J. Forrester, D. Wittrup, Multicopy Overexpression of Bovine  
942 Pancreatic Trypsin Inhibitor Saturates the Protein Folding and Secretory Capacity of  
943 *Saccharomyces cerevisiae*. *Protein Expr. Purif.* **6**, 537–545 (1995).
- 944 114. A. Bryksin, I. Matsumura, Overlap extension PCR cloning: a simple and reliable way to  
945 create recombinant plasmids. *BioTechniques* **48**, 463–465 (2010).
- 946 115. M. H. Nørholm, A mutant Pfu DNA polymerase designed for advanced uracil-excision  
947 DNA engineering. *BMC Biotechnol.* **10**, 21 (2010).
- 948 116. H. H. Nour-Eldin, B. G. Hansen, M. H. H. Nørholm, J. K. Jensen, B. A. Halkier,  
949 Advancing uracil-excision based cloning towards an ideal technique for cloning PCR  
950 fragments. *Nucleic Acids Res.* **34**, e122–e122 (2006).
- 951 117. R. D. Gietz, “Yeast Transformation by the LiAc/SS Carrier DNA/PEG Method” in *Yeast*  
952 *Protocols*, Methods in Molecular Biology., W. Xiao, Ed. (Springer New York, 2014), pp.  
953 33–44.
- 954 118. R. T. Niebauer, A. S. Robinson, Exceptional total and functional yields of the human  
955 adenosine (A2a) receptor expressed in the yeast *Saccharomyces cerevisiae*. *Protein Expr.*  
956 *Purif.* **46**, 204–211 (2006).
- 957 119. M. A. O’Malley, T. Lazarova, Z. T. Britton, A. S. Robinson, High-level expression in  
958 *Saccharomyces cerevisiae* enables isolation and spectroscopic characterization of  
959 functional human adenosine A2a receptor. *J. Struct. Biol.* **159**, 166–178 (2007).
- 960 120. H. M. Weiß, R. Grisshammer, Purification and characterization of the human adenosine  
961 A2a receptor functionally expressed in *Escherichia coli*: Purification and characterization  
962 of A2a receptor. *Eur. J. Biochem.* **269**, 82–92 (2002).
- 963 121. N. Eswar, *et al.*, Comparative Protein Structure Modeling Using Modeller. *Curr. Protoc.*  
964 *Bioinforma.* **15**, 5.6.1-5.6.30 (2006).
- 965 122. D. H. de Jong, *et al.*, Improved Parameters for the Martini Coarse-Grained Protein Force  
966 Field. *J. Chem. Theory Comput.* **9**, 687–697 (2013).
- 967 123. X. Periole, M. Cavalli, S.-J. Marrink, M. A. Ceruso, Combining an Elastic Network With  
968 a Coarse-Grained Molecular Force Field: Structure, Dynamics, and Intermolecular  
969 Recognition. *J. Chem. Theory Comput.* **5**, 2531–2543 (2009).
- 970 124. L. Monticelli, *et al.*, The MARTINI Coarse-Grained Force Field: Extension to Proteins.  
971 *J. Chem. Theory Comput.* **4**, 819–834 (2008).
- 972 125. M. J. Abraham, *et al.*, GROMACS: High performance molecular simulations through  
973 multi-level parallelism from laptops to supercomputers. *SoftwareX* **1–2**, 19–25 (2015).
- 974 126. G. Bussi, D. Donadio, M. Parrinello, Canonical sampling through velocity rescaling. *J.*  
975 *Chem. Phys.* **126**, 014101 (2007).

- 976 127. R. Martoňák, A. Laio, M. Parrinello, Predicting Crystal Structures: The Parrinello-  
977 Rahman Method Revisited. *Phys. Rev. Lett.* **90** (2003).
- 978 128. T. A. Wassenaar, K. Pluhackova, R. A. Böckmann, S. J. Marrink, D. P. Tieleman, Going  
979 Backward: A Flexible Geometric Approach to Reverse Transformation from Coarse  
980 Grained to Atomistic Models. *J. Chem. Theory Comput.* **10**, 676–690 (2014).
- 981 129. B. Hess, H. Bekker, H. J. C. Berendsen, J. G. E. M. Fraaije, LINCS: A linear constraint  
982 solver for molecular simulations. *J. Comput. Chem.* **18**, 1463–1472 (1997).
- 983 130. R. B. Best, *et al.*, Optimization of the Additive CHARMM All-Atom Protein Force Field  
984 Targeting Improved Sampling of the Backbone  $\phi$ ,  $\psi$  and Side-Chain  $\chi_1$  and  $\chi_2$  Dihedral  
985 Angles. *J. Chem. Theory Comput.* **8**, 3257–3273 (2012).
- 986 131. W. L. Jorgensen, J. Chandrasekhar, J. D. Madura, R. W. Impey, M. L. Klein,  
987 Comparison of simple potential functions for simulating liquid water. *J. Chem. Phys.* **79**,  
988 926–935 (1983).
- 989 132. X. Daura, *et al.*, Peptide Folding: When Simulation Meets Experiment. *Angew. Chem.*  
990 *Int. Ed.* **38**, 236–240 (1999).
- 991 133. T. D. Romo, A. Grossfield, LOOS: An extensible platform for the structural analysis of  
992 simulations in *2009 Annual International Conference of the IEEE Engineering in*  
993 *Medicine and Biology Society*, (IEEE, 2009), pp. 2332–2335.
- 994 134. W. Humphrey, A. Dalke, K. Schulten, VMD: Visual Molecular Dynamics. *J. Mol.*  
995 *Graph.* **14**, 33–38 (1996).
- 996 135. *The PyMOL Molecular Graphics System, Version 2.0 Schrödinger, LLC.*
- 997 136. J. Kyte, R. F. Doolittle, A simple method for displaying the hydrophobic character of a  
998 protein. *J. Mol. Biol.* **157**, 105–132 (1982).
- 999
